# Supplementary material for: Korean frailty and aging cohort study (KFACS): cohort profile
Source: PubMed Central journal article supplement — BMJ Open. 2020 Apr 22;10(4):e035573. doi: 10.1136/bmjopen-2019-035573 (PMC7204935; doi:10.1136/bmjopen-2019-035573), 2020-04-22

# BMJ Open

BMJ Open is committed to open peer review. As part of this commitment we make the peer review history of every article we publish publicly available.

When an article is published we post the peer reviewers' comments and the authors' responses online. We also post the versions of the paper that were used during peer review. These are the versions that the peer review comments apply to.

The versions of the paper that follow are the versions that were submitted during the peer review process. They are not the versions of record or the final published versions. They should not be cited or distributed as the published version of this manuscript.

BMJ Open is an open access journal and the full, final, typeset and author-corrected version of record of the manuscript is available on our site with no access controls, subscription charges or pay-per-view fees (<http://bmjopen.bmj.com>).

If you have any questions on BMJ Open's open peer review process please email [info.bmjopen@bmj.com](mailto:info.bmjopen@bmj.com)

# BMJ Open

## Cohort Profile: Korean Frailty and Aging Cohort Study (KFACTS)

|                               |                                                                                                                                                                                                                                                                                                                                                                                                                                                                                                                                                                                                                                                                                                                                                                                                                                                                                                                                                                                                                                                                                                                                                                                 |
|-------------------------------|---------------------------------------------------------------------------------------------------------------------------------------------------------------------------------------------------------------------------------------------------------------------------------------------------------------------------------------------------------------------------------------------------------------------------------------------------------------------------------------------------------------------------------------------------------------------------------------------------------------------------------------------------------------------------------------------------------------------------------------------------------------------------------------------------------------------------------------------------------------------------------------------------------------------------------------------------------------------------------------------------------------------------------------------------------------------------------------------------------------------------------------------------------------------------------|
| Journal:                      | <i>BMJ Open</i>                                                                                                                                                                                                                                                                                                                                                                                                                                                                                                                                                                                                                                                                                                                                                                                                                                                                                                                                                                                                                                                                                                                                                                 |
| Manuscript ID                 | bmjopen-2019-035573                                                                                                                                                                                                                                                                                                                                                                                                                                                                                                                                                                                                                                                                                                                                                                                                                                                                                                                                                                                                                                                                                                                                                             |
| Article Type:                 | Cohort profile                                                                                                                                                                                                                                                                                                                                                                                                                                                                                                                                                                                                                                                                                                                                                                                                                                                                                                                                                                                                                                                                                                                                                                  |
| Date Submitted by the Author: | 06-Nov-2019                                                                                                                                                                                                                                                                                                                                                                                                                                                                                                                                                                                                                                                                                                                                                                                                                                                                                                                                                                                                                                                                                                                                                                     |
| Complete List of Authors:     | <p>Won, Chang Won; Kyung Hee University School of Medicine<br/> Lee, Seoyoon; Kyung Hee University Medical Center, ; Yonsei University,<br/> <br/> Lee, Yunhwan; Ajou University<br/> Kim, Miji; Kyung Hee University<br/> Kim, Jinhee; Ajou University<br/> Chon, Doukyoung<br/> Kim, Sunyoung; Kyung Hee University Medical Center<br/> Kim, Chang-O; Sungkonghoe University<br/> Kim, Mi Kyung; Hanyang University College of Medicine, Preventive<br/> Medicine<br/> Cho, BeLong; Seoul National University Hospital<br/> Choi, Kyung Mook; Korea University<br/> Roh, Eun; Korea University<br/> Jang, Hak Chul; Seoul National University Bundang Hospital<br/> Son, Sang Joon; Ajou University<br/> Lee, Jin-Hee; Catholic University of Korea<br/> Park, Yong Soon; Hallym University<br/> Lee, Sam-Gyu ; Chonnam National University Medical School,<br/> Department of Physical and Rehabilitation Medicine<br/> Kim, Bong Jo; Gyeongsang National University<br/> Kim, Hyeon Ju ; Jeju National University College of Medicine and<br/> Graduate School of Medicine, Family Medicine; Jeju National University<br/> Lee, Kee Jae; Korea National Open University</p> |
| Keywords:                     | GERIATRIC MEDICINE, PREVENTIVE MEDICINE, PUBLIC HEALTH                                                                                                                                                                                                                                                                                                                                                                                                                                                                                                                                                                                                                                                                                                                                                                                                                                                                                                                                                                                                                                                                                                                          |
|                               |                                                                                                                                                                                                                                                                                                                                                                                                                                                                                                                                                                                                                                                                                                                                                                                                                                                                                                                                                                                                                                                                                                                                                                                 |

SCHOLARONE™  
Manuscripts

1  
2  
3  
4 **Title Page: Cohort Profile**  
5

6  
7 **Title: Cohort Profile: Korean Frailty and Aging Cohort Study (KFACS)**  
8  
9

10  
11 **Authors:**  
12

13 **Chang Won Won**<sup>1,2</sup>, **Seoyoon Lee**<sup>1,3</sup>, Jinhee Kim<sup>4</sup>, Doukyoung Chon<sup>5</sup>, Sunyoung Kim<sup>2</sup>,  
14 Chang-O Kim<sup>6</sup>, Mi Kyung Kim<sup>7</sup>, Belong Cho<sup>8</sup>, Kyung Mook Choi<sup>9</sup>, Eun Roh<sup>9</sup>, Hak Chul  
15 Jang<sup>10</sup>, Sang Joon Son<sup>11</sup>, Jin-Hee Lee<sup>12</sup>, Yong Soon Park<sup>13</sup>, Sam-Gyu Lee<sup>14</sup>, Bong Jo Kim<sup>15</sup>,  
16 Hyeon ju Kim<sup>16</sup>, Kee Jae Lee<sup>17</sup>, Yunhwan Lee<sup>3\*</sup>, Miji Kim<sup>18\*</sup>, and the KFACS Group  
17  
18

19 <sup>1</sup> Elderly Frailty Research Center, Department of Family Medicine, College of Medicine,  
20 Kyung Hee University, Seoul, Republic of Korea

21 <sup>2</sup> Department of Family Medicine, Kyung Hee University Medical Center, Seoul, Republic of  
22 Korea  
23

24 <sup>3</sup> School of Social Welfare, Yonsei University, Seoul, Republic of Korea

25 <sup>4</sup> Department of Preventive Medicine and Public Health, Ajou University School of  
26 Medicine, Suwon, Republic of Korea  
27

28 <sup>5</sup> Department of Preventive Medicine, Korea University College of Medicine, Seoul,  
29 Republic of Korea

30 <sup>6</sup> Institute of Social Welfare, SungKongHoe University, Seoul, Korea

31 <sup>7</sup> Department of Preventive Medicine, Hanyang University, College of Medicine, Seoul,  
32 Republic of Korea  
33

34 <sup>8</sup> Department of Family Medicine, Center for Health Promotion and Optimal Aging, Seoul  
35 National University College of Medicine & Hospital, Seoul, Republic of Korea

36 <sup>9</sup> Division of Endocrinology and Metabolism, Department of Internal Medicine, Korea  
37 University, Seoul, Republic of Korea  
38

39 <sup>10</sup> Department of Internal Medicine, Seoul National University Bundang Hospital, Seoul  
40 National University, College of Medicine, Seongnam, Korea

41 <sup>11</sup> Department of Psychiatry, Ajou University School of Medicine, Suwon, Republic of Korea

42 <sup>12</sup> Catholic institute of U-healthcare, The Catholic University of Korea, Seoul, Republic of  
43 Korea  
44

45 <sup>13</sup> Department of Family Medicine, Hallym University Chuncheon Sacred Heart Hospital,  
46 Chuncheon, Republic of Korea

47 <sup>14</sup> Department of Physical & Rehabilitation Medicine, Chonnam National University Medical  
48 School, Gwangju, Republic of Korea  
49

50 <sup>15</sup> Department of Psychiatry, College of Medicine, Gyeongsang National University, Jinju,  
51 Republic of Korea

52 <sup>16</sup> Department of Family Medicine, Jeju National University School of Medicine, Jeju,  
53 Republic of Korea  
54

55 <sup>17</sup> Department of Information and Statistics, Korea National Open University, Seoul,  
56 Republic of Korea  
57

58 <sup>18</sup> Department of Biomedical Science and Technology, College of Medicine, East-West  
59 Medical Research Institute, Kyung Hee University, Seoul, Republic of Korea  
60

1  
2  
3  
4 **Corresponding author:**  
5

6 Yunhwan Lee\*, MD, DrPH  
7

8 \*Corresponding author: Department of Preventive medicine and Public Health, Ajou  
9 University School of Medicine, Suwon, Republic of Korea. Email: [yhlee@ajou.ac.kr](mailto:yhlee@ajou.ac.kr)  
10  
11

12  
13 Miji Kim\*, PhD  
14

15 \*Corresponding author: Department of Biomedical Science and Technology, College of  
16 Medicine, East-West Medical Research Institute, Kyung Hee University, Seoul, Republic of  
17 Korea. Email: [mijiak@khu.ac.kr](mailto:mijiak@khu.ac.kr)  
18  
19  
20  
21  
22  
23  
24  
25  
26  
27  
28  
29

30 Table 1. General characteristics of participants in the Korean Frailty and Aging Cohort Study  
31 (KFACS) baseline survey, 2016 – 2017. Participants were sorted into three age groups (70 –74, 75 –  
32 79, and 80 – 84 years).  
33

34 Table 2. Summary of key variables collected from the Korean Frailty and Aging Cohort Study  
35 (KFACS) at baseline (2016-2017) and the first follow-up period (2019-2020)  
36

37 Table 3. List of laboratory test variables collected during the Korean Frailty and Aging  
38 Cohort Study (KFACS) baseline survey (2016 – 2017)  
39

40 Table 4. Characteristics of participants of the KFACS baseline survey, 2016 – 2017 according to  
41 Fried's frailty phenotype (n = 2907). Participants were sorted into three age groups (70 –74, 75 – 79,  
42 and 80 – 84 years).  
43

44 Figure 1. Locations of the 10 centers involved in the Korean Frailty and Aging Cohort Study  
45 (KFACS)  
46  
47  
48  
49  
50  
51  
52  
53  
54  
55  
56  
57  
58

59 Word count: 3,092  
60

## Abstract

**Purpose** The purpose of KFACS is to initiate a nationwide, population-based prospective cohort study of older adults living in the community to assess their frailty status and explore transitions between frailty states over time.

**Participants** The KFACS is a multicenter longitudinal study with the baseline survey conducted from May 2016 to November 2017. Each center recruited participants using quota sampling stratified by age and sex. The number of participants recruited through 2 years of baseline study from 10 centers was 3014, with each site accounting for approximately 300 participants.

**Findings to date** The key variables of KFACS are as follows: Demographics, Lifestyle and health-related behaviors, Health status, Social function, Cognitive function, Anthropometric measurements, Physical function, Health assessments (blood pressure, heart rate, visual acuity assessment, hearing (pure tone audiometry) assessment, electrocardiogram test, chest X-ray), Body composition (dual energy X-ray absorptiometry (DEXA) in 8 centers and bioelectrical impedance analysis (BIA) at 2 centers, Panoramic radiography), and laboratory tests. In the baseline study of 2016–2017, 2907 of 3014 individuals fulfilled all five components of Fried's frailty phenotype. The results indicated that 7.8% of the participants (n=228) were frail, 47.0% (n=1366) were pre-frail, and 45.2% (n=1313) were robust. The prevalence of frailty increased with age in both sexes; in the group aged 70–74 years, 1.8% of men and 3.7% of women were frail, whereas in the 80–84 years age group, 14.9% of men and 16.7% of women were frail. Women tended to exhibit a higher prevalence of frailty than men in all age groups.

**Future plans** Frailty is increasingly recognized as a major threat to healthy aging, and the KFACS is expected to be a valuable resource hub in identifying risk factors and building an evidence base for the prevention and management of frailty in community-dwelling older adults in Korea.

**Key words:** Frailty, cohort studies, aging, older adults, Republic of Korea

### Strengths and limitations of this study

- The main strengths of the KFACS are the inclusion of a nationwide population of community-dwelling Korean older adults
- The KFACS has a comprehensive scope of assessments, with the inclusion of physical examinations, health assessments, a neuropsychological battery for cognitive function, in-depth social function surveys, dental radiography, blood tests and banking, and most importantly, a diverse range of frailty and sarcopenia assessments.
- The KFACS includes two sub-cohort studies i.e., a survey of social frailty involving bimonthly interviews and a nutrition survey involving home visits.
- One weakness of the study is that the participants had to be ambulatory to visit the 10 centers in the baseline survey, and home-bound disabled or institutionalized persons could not participate. In addition, dementia patients with problems in communication were excluded.
- The participants were not selected through probability sampling due to the strengthened data privacy laws that prevented researchers from acquiring the personal information of people living in the communities around the 10 centers. However, the distribution of sample characteristics (age, sex, education, place of residence) of KFACS participants was similar to the estimates of the older (70 – 84 years) population drawn from the national census.

## Introduction

The population of Korea is aging rapidly, with more than 14% of the total population in Korea consisting of people older than 65 years according to the 2018 Aged Population Report created by the Korean Statistical Information Service. The proportion of the aged in the population is projected to increase to 24.5% by 2030 and 41.0% by 2060 [1]. The percentage of the population older than 75 years is estimated to reach 10.0% by 2030 and 25.9% by 2060, with the percentage of the population aged 85 years and older predicted to increase to 2.8% and 11.2% by these dates, respectively [1,2]. Aging of the population is accompanied by increased rates of multimorbidity along with increased need for social support, as well as increased burden on families and public health medical expenditure [3,4]. An increasing proportion of community-dwelling older adults present frailty, a status of extreme vulnerability to endogenous and exogenous stressors exposing the individual to increased risk of negative health-related outcomes [5]. Therefore, it is becoming increasingly important to develop means of identifying frailty, which represents a transition phase between healthy aging and disability, as well as develop interventions to prevent adverse outcomes [5].

Although many Korean cohort studies on age-related health conditions for older adults have been reported, such as the Korean Longitudinal Study on Health and Aging (KLoSHA) [6], Korean Urban and Rural Elderly (KURE) cohort study [7], and Aging Study of Pyeongchang Rural Area (ASPRA) [8], none focused on frailty in older adults on a nationwide scale. With a focus on evidence-based diagnosis and management methods of frailty in community-dwelling older adults, the Korean Frailty and Aging Cohort Study (KFACS) was instigated with funding from the Ministry of Health and Welfare in December 2015 [9]. The purpose of KFACS is to initiate a nationwide, population-based prospective cohort study of older adults living in the community to assess their frailty status and explore

1  
2  
3  
4 transitions between frailty states over time. The specific aims of the study were to 1) identify  
5 risk factors involved in the transition between states of frailty and the development of adverse  
6 outcomes, such as disability, institutionalization, and mortality; 2) develop models for  
7 predicting the onset and progression of frailty; and 3) create an evidence base for developing  
8 clinical practice guidelines for the prevention and management of frailty in older adults [9].  
9  
10  
11  
12  
13  
14

### 15 16 **Cohort description**

17  
18  
19 The KFACS is a multicenter longitudinal study with the baseline survey conducted  
20 from May 2016 to November 2017. The participants were recruited from among community-  
21 dwelling residents in urban and rural areas nationwide in 10 study centers across different  
22 regions—three from Seoul Metropolitan Area, two from Gyeonggi Province, and one from  
23 each of Gangwon Province, Chungcheong-buk Province, Jeolla-nam Province, Gyeongsang-  
24 nam Province, and Jeju Island in South Korea (Figure 1).  
25  
26  
27  
28  
29  
30  
31  
32  
33  
34  
35  
36  
37  
38  
39  
40  
41  
42  
43  
44  
45  
46  
47  
48  
49  
50  
51  
52  
53  
54  
55  
56  
57  
58  
59  
60



**Figure 1.** Locations of the 10 centers involved in the Korean Frailty and Aging Cohort Study (KFACTS)

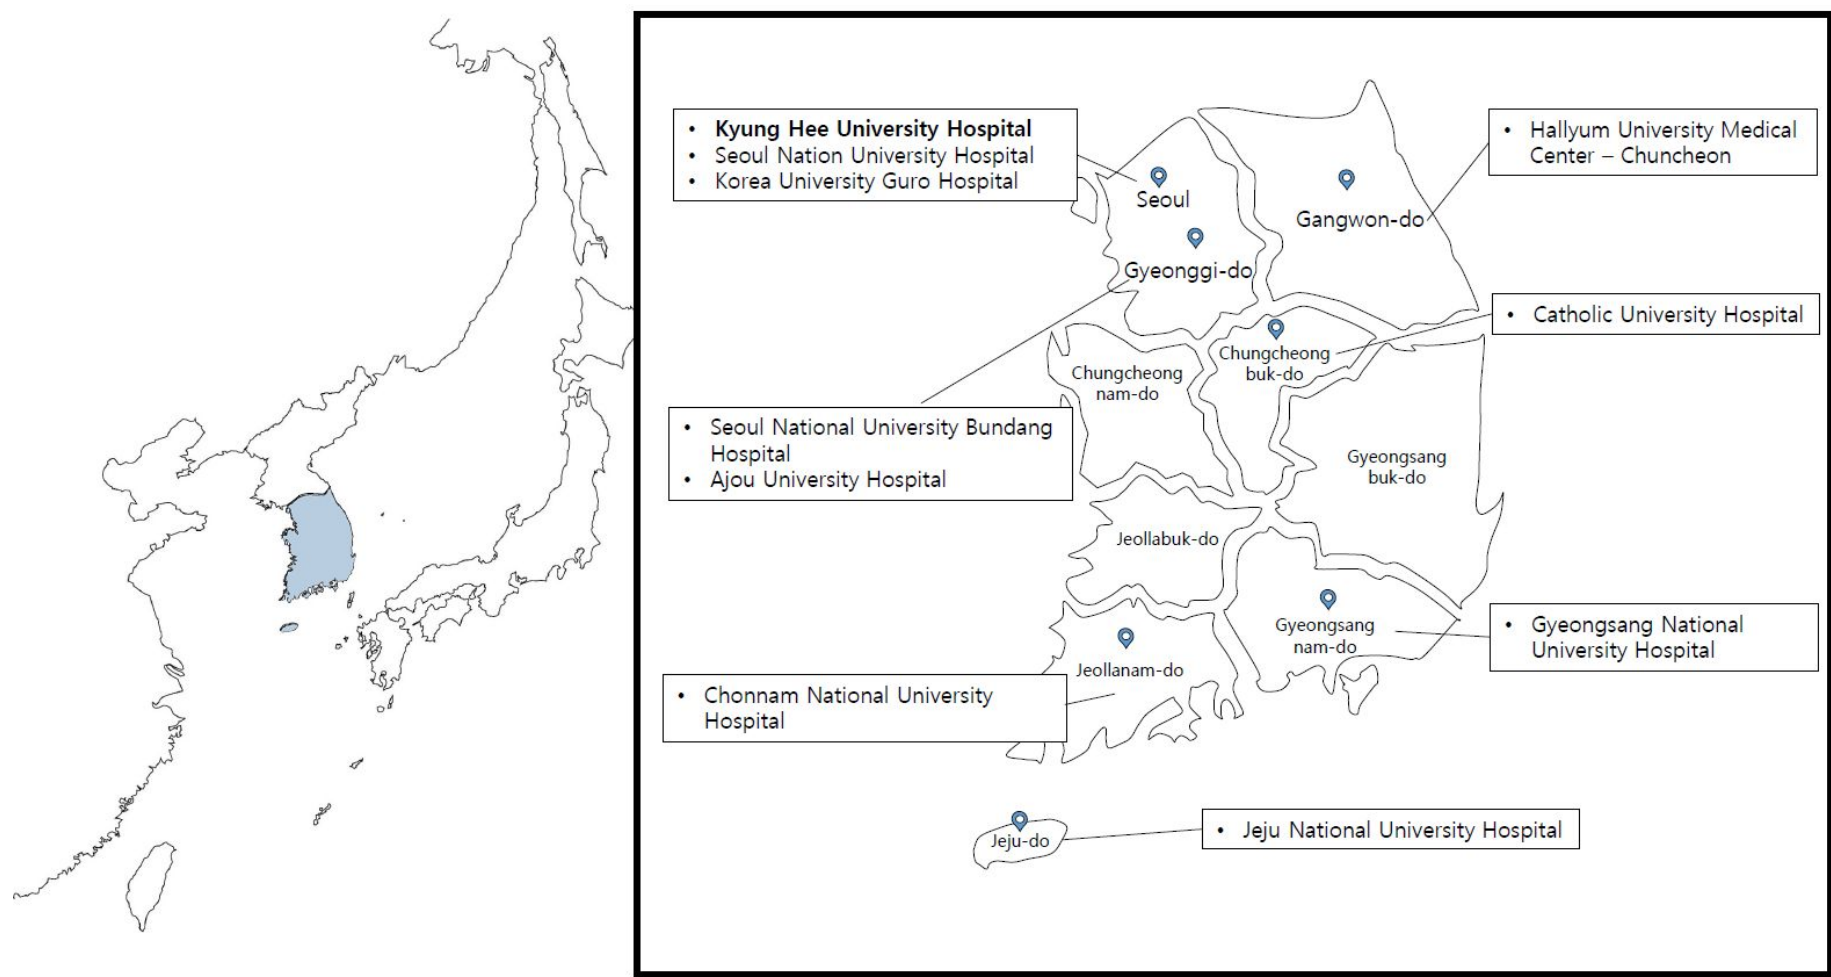

1  
2  
3  
4  
5  
6  
7  
8  
9  
10  
11  
12  
13  
14  
15  
16  
17  
18  
19  
20  
21  
22  
23  
24  
25  
26  
27  
28  
29  
30  
31  
32  
33  
34  
35  
36  
37  
38  
39  
40  
41  
42  
43  
44  
45  
46

1  
2  
3  
4 Each center recruited participants using quota sampling stratified by age and sex at local  
5 senior welfare centers, community health centers, apartments, housing complexes, and outpatient  
6  
7 clinics. We used quota sampling based on age (70 – 74, 75 – 79, and 80 – 84 years with a ratio of  
8  
9 6:5:4, respectively) and sex (male, female) with the aim of recruiting 1500 men and 1500  
10  
11 women.  
12  
13  
14

15  
16 The inclusion criteria were an age of 70 – 84 years, living independently at home,  
17  
18 having no plans to move out in the next 2 years, and no problems with communication due to  
19  
20 serious cognitive impairment. The number of participants recruited through 2 years of baseline  
21  
22 study from 10 centers was 3014, with each site accounting for approximately 300 participants.  
23  
24

25  
26 Of the 3014 participants, 1559 (51.7%) joined the study in 2016 and 1455 (48.3%)  
27  
28 joined in 2017. The mean age was 76.0 years, and 1582 participants (52.5%) were female.  
29  
30 Overall, 39.4% were aged 70–74 years, 37.4% were aged 75 – 79 years, and 23.2% were in their  
31  
32 80s. The baseline survey indicated that 28% of the subjects were urban residents, 42% were  
33  
34 suburban residents, and 30% were residents of rural areas (Table 1). Other general characteristics  
35  
36 of the KFACS participants are shown in Table 1.  
37  
38  
39  
40  
41  
42  
43  
44  
45  
46  
47  
48  
49  
50  
51  
52  
53  
54  
55  
56  
57  
58  
59  
60

**Table 1.** General characteristics of participants in the Korean Frailty and Aging Cohort Study (KFACTS) baseline survey, 2016 – 2017. Participants were sorted into three age groups (70 –74, 75 – 79, and 80 – 84 years).

| Variable                                        | Total         | Male (n=1,432) |               |               | p-value | Female (n=1,582) |              |              | p-value |
|-------------------------------------------------|---------------|----------------|---------------|---------------|---------|------------------|--------------|--------------|---------|
|                                                 |               | 70-74          | 75-79         | 80-84         |         | 70-74            | 75-79        | 80-84        |         |
| Total baseline study participants, <i>n</i> (%) | 3014 (100)    | 521 (17.3)     | 552 (18.3)    | 359 (11.9)    |         | 668 (22.2)       | 574 (19)     | 340 (11.3)   |         |
| 2016, <i>n</i> (%)                              | 1559 (51.7)   | 267 (8.9)      | 280 (9.3)     | 187 (6.2)     |         | 338 (11.2)       | 297 (9.9)    | 190 (6.3)    |         |
| 2017, <i>n</i> (%)                              | 1455 (48.3)   | 254 (8.4)      | 272 (9)       | 172 (5.7)     |         | 330 (10.9)       | 277 (9.2)    | 150 (5)      |         |
| Demographics, <i>n</i> (%)                      |               |                |               |               |         |                  |              |              |         |
| Marital Status                                  |               |                |               |               |         |                  |              |              |         |
| Single                                          | 4 (0.1)       | 2 (0.4)        | 0 (0.0)       | 1 (0.3)       |         | 1 (0.1)          | 0 (0.0)      | 0 (0.0)      |         |
| Married                                         | 2929 (97.3)   | 505 (97.1)     | 536 (97.3)    | 350 (97.5)    | 0.697   | 645 (96.6)       | 561 (97.7)   | 332 (97.9)   | .520    |
| Divorced/widowed                                | 78 (2.6)      | 13 (2.5)       | 15 (2.7)      | 8 (2.2)       |         | 22 (3.3)         | 13 (2.3)     | 7 (2.1)      |         |
| Residence area                                  |               |                |               |               |         |                  |              |              |         |
| Urban                                           | 827 (27.6)    | 137 (26.5)     | 146 (26.6)    | 106 (29.5)    |         | 186 (28)         | 160 (28.1)   | 92 (27.1)    |         |
| Suburban                                        | 1262 (42.1)   | 211 (40.8)     | 223 (40.6)    | 140 (39)      | 0.877   | 291 (43.8)       | 262 (46.0)   | 135 (39.8)   | .224    |
| Rural                                           | 909 (30.3)    | 169 (32.7)     | 180 (32.8)    | 113 (31.5)    |         | 187 (28.2)       | 148 (26.0)   | 112 (33.0)   |         |
| Education                                       |               |                |               |               |         |                  |              |              |         |
| < Middle school                                 | 1452 (48.2)   | 150 (28.8)     | 169 (30.6)    | 127 (35.5)    |         | 383 (57.3)       | 365 (63.7)   | 258 (75.9)   |         |
| Middle and high school                          | 1048 (34.8)   | 235 (21.1)     | 226 (17.6)    | 140 (12.3)    | 0.024   | 218 (16.2)       | 155 (11.9)   | 74 (10.9)    | < 0.001 |
| ≥ College                                       | 512 (17.0)    | 136 (50.1)     | 157 (51.8)    | 91 (52.2)     |         | 67 (26.5)        | 53 (24.4)    | 8 (13.2)     |         |
| Receiving allowance, yes, <i>n</i> (%)          | 166 (5.5)     | 31 (6.0)       | 20 (3.6)      | 22 (6.1)      | 0.132   | 30 (4.5)         | 26 (4.5)     | 37 (10.9)    | < 0.001 |
| Receiving medical aid, yes, <i>n</i> (%)        | 45 (1.5)      | 4 (0.8)        | 6 (1.1)       | 4 (1.1)       | 0.829   | 9 (1.3)          | 11 (1.9)     | 11 (3.2)     | 0.124   |
| Lifestyle characteristics                       |               |                |               |               |         |                  |              |              |         |
| Current drinker, <i>n</i> (%)                   | 890 (41.2)    | 269 (56.8)     | 273 (54.7)    | 169 (52.6)    | 0.517   | 80 (19.7)        | 61 (21.4)    | 38 (21.6)    | 0.812   |
| Current smoker, <i>n</i> (%)                    | 174 (15.1)    | 61 (14.8)      | 56 (13.3)     | 41 (15.0)     | 0.775   | 2 (11.8)         | 4 (40.0)     | 10 (52.6)    | 0.034   |
| Sleeping (h/day), mean (SD)                     | 6.24 (1.47)   | 6.43 (1.39)    | 6.54 (1.31)   | 6.54 (1.50)   | 0.354   | 6.06 (1.47)      | 5.87 (1.50)  | 6.08 (1.54)  | 0.056   |
| Physical activity (METs/week), mean (SD)        | 52.45 (63.58) | 71.52 (85.37)  | 66.08 (68.75) | 46.52 (54.89) | < 0.001 | 51.01 (59.48)    | 39.5 (43.72) | 32.6 (46.61) | < 0.001 |
| Body composition, mean (SD)                     |               |                |               |               |         |                  |              |              |         |
| Calf circumference (cm)                         | 33.8 (2.7)    | 33.8 (2.7)     | 33.8 (2.7)    | 33.8 (2.7)    | < 0.001 | 33.7 (2.4)       | 33.7 (2.4)   | 33.7 (2.4)   | < 0.001 |
| Waist circumference (cm)                        | 87.7 (8.6)    | 87.7 (8.6)     | 87.7 (8.6)    | 87.7 (8.6)    | 0.530   | 86.4 (8.0)       | 86.4 (8.0)   | 86.4 (8.0)   | 0.116   |
| BMI (kg/m <sup>2</sup> )                        | 24.4 (3.0)    | 24.4 (3.0)     | 24.4 (3.0)    | 24.4 (3.0)    | 0.008   | 24.9 (2.9)       | 24.9 (2.9)   | 24.9 (2.9)   | 0.687   |
| Physical function                               |               |                |               |               |         |                  |              |              |         |
| Timed up-and-go (s), mean (SD)                  | 10.5 (2.9)    | 9.5 (2.7)      | 10.4 (2.5)    | 11.1 (2.7)    | < 0.001 | 9.9 (2.2)        | 10.8 (3.2)   | 12.5 (3.5)   | < 0.001 |
| ADL disability, <i>n</i> (%)                    | 337 (11.2)    | 32 (6.1)       | 42 (7.6)      | 41 (11.4)     | 0.016   | 64 (9.6)         | 86 (15.0)    | 72 (21.2)    | < 0.001 |
| IADL disability, <i>n</i> (%)                   | 1148 (38.1)   | 311 (59.7)     | 303 (54.9)    | 219 (61.0)    | 0.128   | 101 (15.1)       | 107 (18.6)   | 107 (31.5)   | < 0.001 |
| Fall experience, yes, <i>n</i> (%)              | 612 (20.3)    | 67 (12.9)      | 96 (17.4)     | 65 (18.1)     | 0.055   | 136 (20.4)       | 160 (27.9)   | 88 (25.9)    | 0.006   |
| SPPB, mean (SD)                                 | 3.74 (1.28)   | 3.32 (0.83)    | 3.58 (1.43)   | 3.92 (1.14)   | < 0.001 | 3.54 (0.87)      | 3.88 (1.28)  | 4.58 (1.84)  | < 0.001 |
| Grip strength (kg), mean (SD)                   | 26.2 (7.6)    | 34.2 (5.6)     | 32.2 (5.8)    | 28.8 (5.4)    | < 0.001 | 22 (4.0)         | 20.7 (4.1)   | 18.9 (3.9)   | < 0.001 |

|    |                                                |             |             |             |             |         |             |             |             |         |
|----|------------------------------------------------|-------------|-------------|-------------|-------------|---------|-------------|-------------|-------------|---------|
| 1  | Gait speed (m/s), mean (SD)                    | 1.1 (0.26)  | 1.21 (0.25) | 1.16 (0.27) | 1.04 (0.24) | < 0.001 | 1.14 (0.23) | 1.05 (0.22) | 0.92 (0.22) | < 0.001 |
| 2  | Psychological function, mean (SD)              |             |             |             |             |         |             |             |             |         |
| 3  | Self-rated health (range: 0 – 100)             | 73.9(17.4)  | 77.7(14.5)  | 76.2(15.3)  | 72.4(16.4)  | < 0.001 | 74.7(17.8)  | 71.8(18.6)  | 67.8(20.7)  | < 0.001 |
| 4  | GDS (range: 0 – 15)                            | 3.3 (3.7)   | 2 (3.0)     | 2.5 (3.4)   | 3.1 (3.3)   | < 0.001 | 3.4 (3.7)   | 4.1 (4.1)   | 4.9 (4.3)   | < 0.001 |
| 5  | EQ-5D (range: 0 – 1)                           | 0.9 (0.1)   | 0.0(0.1)    | 0.9 (0.1)   | 0.9 (0.1)   | < 0.001 | 0.9 (0.1)   | 0.8 (0.1)   | 0.8 (0.2)   | < 0.001 |
| 6  | Cognitive function, mean (SD)                  |             |             |             |             |         |             |             |             |         |
| 7  | MMSE-KC (range: 0 – 30)                        | 25.5 (3.4)  | 26.8 (2.4)  | 26.1 (3.1)  | 25.3 (3.6)  | < 0.001 | 25.9 (3.2)  | 24.8 (3.4)  | 23.3 (3.8)  | < 0.001 |
| 8  | Word list: memory (range: 0 – 30)              | 16.6 (4.4)  | 17.8 (3.7)  | 16.2 (4.0)  | 14.4 (4.2)  | < 0.001 | 18.1 (4.1)  | 16.6 (4.5)  | 14.6 (4.7)  | < 0.001 |
| 9  | Word list: recall (range: 0 – 10)              | 5.5 (2.1)   | 6.1 (1.9)   | 5.3 (2.0)   | 4.6 (2.1)   | < 0.001 | 6.1 (2.0)   | 5.3 (2.1)   | 4.5 (2.2)   | < 0.001 |
| 10 | Word list: recognition (range: 0 – 10)         | 8.5 (1.9)   | 8.9 (1.4)   | 8.5 (1.9)   | 8.2 (2.2)   | < 0.001 | 8.9 (1.6)   | 8.4 (1.9)   | 8 (2.4)     | < 0.001 |
| 11 | FAB (range: 0 – 18)                            | 13.4 (3.1)  | 14.6 (2.4)  | 14 (2.7)    | 13.3 (3.2)  | < 0.001 | 13.4 (2.9)  | 12.7 (3.1)  | 11.4 (3.3)  | < 0.001 |
| 12 | Nutritional status, <i>n</i> (%)               |             |             |             |             |         |             |             |             |         |
| 13 | Normal                                         | 2519 (83.8) | 450 (86.5)  | 457 (82.9)  | 297 (82.7)  |         | 576 (86.2)  | 464 (81.3)  | 275 (81.4)  |         |
| 14 | At risk of malnutrition                        | 457 (15.2)  | 68 (13.1)   | 88 (16.0)   | 53 (14.8)   | 0.037   | 89 (13.3)   | 103 (18.0)  | 56 (16.6)   | 0.013   |
| 15 | Malnutrition, yes, <i>n</i> (%)                | 31 (1.0)    | 2 (0.4)     | 6 (1.1)     | 9 (2.5)     |         | 3 (0.4)     | 4 (0.7)     | 7 (2.1)     |         |
| 16 | Social function, <i>n</i> (%)                  |             |             |             |             |         |             |             |             |         |
| 17 | Social network type                            |             |             |             |             |         |             |             |             |         |
| 18 | Contact with others more than once a week      | 2502 (83.0) | 420 (80.6)  | 449 (81.3)  | 287 (79.9)  | 0.870   | 574 (85.9)  | 486 (84.7)  | 286 (84.1)  | 0.704   |
| 19 | Attending religious gatherings at least once a |             |             |             |             |         |             |             |             |         |
| 20 | month regularly                                | 1272 (42.2) | 161 (30.9)  | 177 (32.1)  | 126 (35.1)  | 0.513   | 355 (53.1)  | 289 (50.3)  | 164 (48.2)  | 0.521   |
| 21 | Social capital                                 |             |             |             |             |         |             |             |             |         |
| 22 | Participating in more than two social          | 1632 (54.1) | 273 (52.4)  | 265 (48.0)  | 172 (47.9)  | 0.272   | 423 (63.3)  | 327 (57.0)  | 172 (50.6)  | < 0.001 |
| 23 | gatherings                                     |             |             |             |             |         |             |             |             |         |
| 24 | Social support                                 |             |             |             |             |         |             |             |             |         |
| 25 | Receiving instrumental support                 | 2212 (73.4) | 380 (72.9)  | 408 (73.9)  | 261 (72.7)  | 0.903   | 496 (74.3)  | 424 (73.9)  | 243 (71.5)  | 0.621   |
| 26 | Receiving informational support                | 2345 (77.8) | 392 (75.2)  | 424 (76.8)  | 273 (76)    | 0.834   | 542 (81.1)  | 452 (78.7)  | 262 (77.1)  | 0.283   |
| 27 | Receiving appraisal support                    | 2351 (78.0) | 392 (75.2)  | 433 (78.4)  | 271 (75.5)  | 0.402   | 540 (80.8)  | 455 (79.3)  | 260 (76.5)  | 0.269   |
| 28 | Medical conditions, <i>n</i> (%)               |             |             |             |             |         |             |             |             |         |
| 29 | Hypertension                                   | 1746 (57.9) | 263 (50.5)  | 302 (54.7)  | 211 (58.8)  | 0.108   | 369 (55.2)  | 354 (61.7)  | 247 (72.6)  | < 0.001 |
| 30 | Diabetes mellitus                              | 663 (22)    | 117 (22.5)  | 136 (24.6)  | 86 (24.0)   | 0.722   | 126 (18.9)  | 116 (20.2)  | 82 (24.1)   | 0.136   |
| 31 | Arthritis                                      | 761 (25.2)  | 62 (11.9)   | 77 (13.9)   | 56 (15.6)   | 0.439   | 205 (30.7)  | 220 (38.3)  | 141 (41.5)  | 0.007   |
| 32 | Osteoporosis                                   | 483 (16.0)  | 8 (1.5)     | 22 (4.0)    | 19 (5.3)    | 0.004   | 158 (23.7)  | 172 (30.0)  | 104 (30.6)  | 0.001   |
| 33 | Depression                                     | 87 (2.9)    | 5 (1.0)     | 15 (2.7)    | 8 (2.2)     | 0.112   | 21 (3.1)    | 26 (4.5)    | 12 (3.5)    | 0.427   |
| 34 | Heart disease                                  | 251 (8.5)   | 53 (10.2)   | 61 (11.2)   | 38 (10.8)   | 0.874   | 31 (4.8)    | 36 (6.4)    | 32 (9.8)    | 0.010   |
| 35 | Polypharmacy                                   | 891 (32.8)  | 174 (28.2)  | 148 (37.6)  | 86 (44.4)   | < 0.001 | 231 (24.2)  | 175 (30.0)  | 77 (42.0)   | < 0.001 |

Abbreviations: BMI = body mass index; ADL = Activities of Daily Living; IADL = Instrumental Activities of Daily Living; SPPB = Short Physical Performance Battery; GDS = Geriatric Depression Scale; EQ-5D = EuroQol five-dimension scale; MMSE = Mini-Mental State Examination; FAB = Frontal Assessment Battery. Nutritional status was rated using the Mini-Nutritional Assessment screening score (12 – 14 points, normal; 8 – 11 points, at risk of malnutrition; 0 – 7 points, malnutrition); polypharmacy indicates the use of five or more prescribed drugs.

There were no statistically significant differences between sexes except for the following variables: marriage status, whether the subject received instrumental support, whether the subject received an allowance, whether the subject received appraisal support, self-rated health, performance in word recall, performance in word recognition, weight loss status, low activity status, grip strength, and gait speed.

The prospective cohort design of the KFACS included data collection every 2 years. The first wave of baseline data collection started in 2016 – 2017, and the follow-up (2018 – 2019) is currently in process. Follow-up surveys are conducted on a 2-year basis with 4 months of allowance limitations. Follow-up for the baseline cohort in 2016 (total number, 1559) was conducted in 2018. The follow-up rate was 92.5%, with 88.4% visiting the clinical sites, 11% involving telephone interviews, and approximately 0.5% involving home visits. The follow-up rate was 93.9% if we included findings such as entering nursing homes (four participants) or death (18 participants). The mean follow-up time range was  $682.6 \pm 34.4$  days.

### *Field work methods*

All participants visited their corresponding study centers to conduct face-to-face interviews, health examinations, and laboratory tests for the baseline survey. At follow-up, participants primarily visited their center, but we also conducted home visits, telephone interviews, and proxy interviews (in this order) if visiting the center was not possible.

### *Data collection and key variables*

**Table 2.** Summary of key variables collected from the Korean Frailty and Aging Cohort Study (KFACS) at baseline (2016-2017) and the first follow-up period (2019-2020)

| Variable | Baseline | Follow-up | Proxy interviews |
|----------|----------|-----------|------------------|
|----------|----------|-----------|------------------|

|    |                                                      |   |   |   |
|----|------------------------------------------------------|---|---|---|
| 1  |                                                      |   |   |   |
| 2  |                                                      |   |   |   |
| 3  |                                                      |   |   |   |
| 4  | <i>Demographics</i>                                  |   |   |   |
| 5  | Age, sex, education                                  | ✓ | ✓ |   |
| 6  | Marital status, family structure                     | ✓ | ✓ | ✓ |
| 7  | Work/employment                                      | ✓ | ✓ |   |
| 8  | Household income                                     | ✓ | ✓ | ✓ |
| 9  | Living environment (rural, suburban, urban)          | ✓ | ✓ |   |
| 10 |                                                      |   |   |   |
| 11 | <i>Health behavior</i>                               |   |   |   |
| 12 | Smoking, alcohol drinking                            | ✓ | ✓ | ✓ |
| 13 | Sleep, physical activity (IPAQ)                      | ✓ | ✓ | ✓ |
| 14 | IPAQ environmental module                            | ✓ |   |   |
| 15 | Oral hygiene, dental checkup                         | ✓ | ✓ |   |
| 16 | Health checkup                                       | ✓ | ✓ |   |
| 17 | Nutritional risk (MNA)                               | ✓ | ✓ | ✓ |
| 18 | Eating behavior                                      | ✓ | ✓ |   |
| 19 | Food security                                        | ✓ |   |   |
| 20 | Short Nutritional Assessment Questionnaire (SNAQ)    |   | ✓ |   |
| 21 |                                                      |   |   |   |
| 22 | <i>Health Status</i>                                 |   |   |   |
| 23 | Self-rated health (SF-12), comorbidity, polypharmacy | ✓ | ✓ |   |
| 24 | Constipation                                         |   | ✓ |   |
| 25 | Quality of life (EQ-5D)                              | ✓ | ✓ |   |
| 26 | EuroQol Visual Analogue Scale (EQ-VAS)               | ✓ | ✓ |   |
| 27 | Depressive symptoms (GDS-SF)                         | ✓ | ✓ |   |
| 28 | K-ADL                                                | ✓ | ✓ |   |
| 29 | K-IADL                                               | ✓ | ✓ | ✓ |
| 30 | Physical resilience                                  |   | ✓ |   |
| 31 | Experience of falls, recent injury, fear of falling  | ✓ | ✓ | ✓ |
| 32 | Activities-specific Balance, Confidence scale (ABC)  | ✓ | ✓ |   |
| 33 | Oral health: mastication, pronunciation difficulties | ✓ | ✓ |   |
| 34 | Women's health                                       | ✓ |   |   |
| 35 |                                                      |   |   |   |
| 36 | <i>Healthcare</i>                                    |   |   |   |
| 37 | Outpatient visits, hospitalization, unmet needs      | ✓ | ✓ |   |
| 38 | Healthcare costs, long-term care services            | ✓ | ✓ |   |
| 39 | Health literacy                                      | ✓ | ✓ |   |
| 40 |                                                      |   |   |   |
| 41 | <i>Social function</i>                               |   |   |   |
| 42 | Social network: PANT                                 | ✓ | ✓ |   |
| 43 | Social capital: Participation in social activities   | ✓ | ✓ | ✓ |
| 44 | Social support: ENRICHD                              | ✓ | ✓ |   |
| 45 |                                                      |   |   |   |
| 46 | <i>Cognitive function (CERAD-K, FAB)</i>             |   |   |   |
| 47 | Global cognition: MMSE                               | ✓ | ✓ |   |
| 48 | Executive function: FAB                              | ✓ | ✓ |   |
| 49 | Processing speed: Trail Making Test A                | ✓ | ✓ |   |
| 50 | Memory: word list memory, recall, recognition        | ✓ | ✓ |   |
| 51 | Attention: digit span forward/digit span backward    | ✓ | ✓ |   |
| 52 | Korean version of the Alzheimer's disease survey     |   |   | ✓ |
| 53 |                                                      |   |   |   |
| 54 | <i>Anthropometry</i>                                 |   |   |   |
| 55 |                                                      |   |   |   |
| 56 |                                                      |   |   |   |
| 57 |                                                      |   |   |   |
| 58 |                                                      |   |   |   |
| 59 |                                                      |   |   |   |
| 60 |                                                      |   |   |   |

|    |                                                           |   |   |   |
|----|-----------------------------------------------------------|---|---|---|
| 1  |                                                           |   |   |   |
| 2  |                                                           |   |   |   |
| 3  |                                                           |   |   |   |
| 4  | Body weight, height                                       | ✓ | ✓ | ✓ |
| 5  | Body weight last year                                     | ✓ | ✓ | ✓ |
| 6  | Head circumference, waist circumference                   | ✓ | ✓ |   |
| 7  | Leg length                                                | ✓ | ✓ |   |
| 8  | Upper arm circumference, calf circumference               | ✓ | ✓ |   |
| 9  |                                                           |   |   |   |
| 10 | <i>Physical function</i>                                  |   |   |   |
| 11 | Hand-grip strength                                        | ✓ | ✓ |   |
| 12 | 4-m usual gait speed                                      | ✓ | ✓ |   |
| 13 | SPPB – item 3: standing balance, item 5: chair-stand      | ✓ | ✓ |   |
| 14 | time, usual gait speed, timed up-and-go test              |   |   |   |
| 15 |                                                           |   |   |   |
| 16 | <i>Health Assessments</i>                                 |   |   |   |
| 17 | Vital signs: blood pressure, heart rate                   | ✓ | ✓ |   |
| 18 | Visual acuity: Snellen chart (corrected vision)           | ✓ | ✓ |   |
| 19 | Hearing: pure tone audiometry (500, 1000, 2000, 3000,     | ✓ | ✓ |   |
| 20 | and 4000 Hz)                                              |   |   |   |
| 21 | Electrocardiogram                                         | ✓ | ✓ |   |
| 22 | Chest X-ray                                               | ✓ | ✓ |   |
| 23 |                                                           |   |   |   |
| 24 | <i>Body composition</i>                                   |   |   |   |
| 25 | Dual Energy X-ray Absorptiometry (DEXA): KFCAS            | ✓ | ✓ |   |
| 26 | at eight medical centers (2016 – 2017)                    |   |   |   |
| 27 | Ultrasound: muscle quality (Kyung Hee University          | ✓ | ✓ |   |
| 28 | only)                                                     |   |   |   |
| 29 | Bioelectric Impedance Analysis (BIA): KFCAS at two        | ✓ | ✓ |   |
| 30 | medical centers                                           |   |   |   |
| 31 | Joint replacement (identifiable from DEXA images)         |   | ✓ |   |
| 32 |                                                           |   |   |   |
| 33 | <i>Panoramic radiography</i>                              |   |   |   |
| 34 | Periodontitis, upper and lower jaw bones (bone mineral    | ✓ | ✓ |   |
| 35 | density)                                                  |   |   |   |
| 36 | Supernumerary, missing, and impacted teeth, etc.          | ✓ | ✓ |   |
| 37 |                                                           |   |   |   |
| 38 | <i>Frailty &amp; Sarcopenia Assessment</i>                |   |   |   |
| 39 | CHS (Fried phenotype): unintentional weight loss, hand    | ✓ | ✓ |   |
| 40 | grip strength, self-reported exhaustion, physical         |   |   |   |
| 41 | activity, gait speed                                      |   |   |   |
| 42 | KLoSHA frailty index: SPPB, K-IADL, K-ADL,                | ✓ | ✓ |   |
| 43 | MMSE, albumin                                             |   |   |   |
| 44 |                                                           |   |   |   |
| 45 | FRAIL questionnaire: fatigue, resistance, ambulation,     | ✓ | ✓ | ✓ |
| 46 | illness, loss of weight                                   |   |   |   |
| 47 |                                                           |   |   |   |
| 48 | Korean Frailty Index: eight items (hospitalization, self- | ✓ | ✓ |   |
| 49 | rated health, polypharmacy, weight loss, depressed        |   |   |   |
| 50 | mood, incontinence, TUG, hearing/vision impairment)       |   |   |   |
| 51 | Frailty scale: weakness, exhaustion, isolation            | ✓ | ✓ |   |
| 52 |                                                           |   |   |   |
| 53 | SOF index: chair-stand, energy (GDS), loss of weight      | ✓ | ✓ |   |
| 54 |                                                           |   |   |   |
| 55 | SARC-F: five items (strength, assistance with walking,    | ✓ | ✓ |   |
| 56 |                                                           |   |   |   |



1  
2  
3  
4 rising from a chair, climbing stairs, falls)

5  
6 Abbreviations: IPAQ = International Physical Activity Questionnaire; MNA = Mini-Nutritional  
7 Assessment; K-ADL = Korean Activities of Daily Living; K-IADL = Korean Instrumental Activities of  
8 Daily Living; SF-12 = 12-item Short Form Survey; EQ-VAS = EuroQol Visual Analogue Scale; ABC =  
9 Activities-specific Balance, Confidence scale; PANT = Practitioner Assessment of Network Type;  
10 ENRICHD = Enhancing Recovery in Coronary Artery Disease; MMSE = Mini-Mental State  
11 Examination; FAB = Frontal Assessment Battery; SPPB = Short Physical Performance Battery; CHS =  
12 Cardiovascular Health Study; KLoSHA = Korean Longitudinal Study on Health and Aging; TUG = timed  
13 up-and-go; SOF = Study of Osteoporotic Fracture; GDS = Geriatric Depression Scale. Health literacy was  
14 assessed based on the capacity to obtain, process, understand, and use health information.  
15

16  
17  
18 The key variables of the KFACS questionnaires are listed in Table 2 and consisted of  
19  
20 demographics, including socioeconomic status, living environment, lifestyle and health-related  
21  
22 behaviors, the International Physical Activity Questionnaire (IPAQ) [10], the IPAQ  
23  
24 environmental module (IPAQ-E) [11], dental checkup status, and nutritional status using the  
25  
26 Korean version of the Mini-Nutritional Assessment (MNA) [12]. Health status was determined  
27  
28 according to self-rated health conditions (SF-12) [13], self-reported and physician-diagnosed  
29  
30 chronic diseases, medications, quality of life (EQ-5D) [14], and EuroQol Visual Analogue Scale  
31  
32 (EQ-VAS) [15]. A 15-item Korean version of the Short Form Geriatric Depression Scale  
33  
34 (SGDS-K) [16], activities of daily living (ADL), instrumental activities of daily living (IADL)  
35  
36 [17], falls and fear of falling, Activities-specific Balance, Confidence scale (ABC) [18], oral  
37  
38 health, and women's health of the participants were scored, and the number of outpatient  
39  
40 services, hospitalization rate, number of long-term care services, and health literacy were  
41  
42 determined to measure health status. Social assessment included Practitioner Assessment of  
43  
44 Network Type (PANT) [19], social participation and activities, and the Enhancing Recovery in  
45  
46 Coronary Artery Disease (ENRICHD) Social Support Instrument [20, 21]. For cognitive  
47  
48 function, assessments were made using the Mini-Mental State Examination (MMSE); Trail  
49  
50 Making Test A; word list memory, recall, and recognition; digit span [22] in the Consortium to  
51  
52  
53  
54  
55  
56  
57  
58  
59  
60



1  
2  
3  
4 Establish a Registry for Alzheimer's disease (CERAD) [23]; and Frontal Assessment Battery  
5 (FAB) [24]. We included anthropometric measurements of body weight, height, head  
6 circumference, waist circumference, leg length, and upper arm circumference. Physical function  
7 was assessed based on grip strength, gait speed, the Short Physical Performance Battery (SPPB),  
8 and timed up-and-go test. Health assessments, such as those for blood pressure, heart rate, visual  
9 acuity, and hearing (pure tone audiometry), as well as electrocardiograms and chest X-rays were  
10 carried out. To determine body composition, dual energy X-ray absorptiometry (DEXA) was  
11 performed at eight centers and bioelectrical impedance analysis (BIA) was performed at two  
12 centers. Panoramic radiography was carried out to assess dental status. Blood samples after an 8-  
13 h fast were taken at around 08:00 to ensure the reliability of hormone tests (Table 3). All blood  
14 and urine samples from the participants at 10 centers were brought to a commercial laboratory  
15 and used for the tests. An extra 10 ml of blood was collected from each participant and sent to  
16 Kyung Hee University Medical Center for storage in deep freezers.  
17  
18  
19  
20  
21  
22  
23  
24  
25  
26  
27  
28  
29  
30  
31  
32  
33  
34  
35  
36  
37

38 **Table 3.** List of laboratory test variables collected during the Korean Frailty and Aging  
39 Cohort Study (KFACS) baseline survey (2016 – 2017)  
40  
41  
42

| 2016 – 2017                                                                                                                                                                                                                                                                                                                                                                                                                                                                                                                                                                                                                                                                                                    |
|----------------------------------------------------------------------------------------------------------------------------------------------------------------------------------------------------------------------------------------------------------------------------------------------------------------------------------------------------------------------------------------------------------------------------------------------------------------------------------------------------------------------------------------------------------------------------------------------------------------------------------------------------------------------------------------------------------------|
| Laboratory Tests (Taken at 08:00 after 8 h of fasting) <ul style="list-style-type: none"> <li>• Hematology: CBC (WBC, RBC, Hb, HCT, MCV, MCHC, platelet)</li> <li>• Biochemistry: AST, ALT, GGT, total protein, albumin, total bilirubin, alkaline phosphatase, creatine kinase, BUN, creatinine, sodium, potassium, chloride, cystatin C, HBs Ag</li> <li>• Metabolic parameters: glucose (FBS), calcium, phosphorus (Pi), magnesium, HbA1c, total cholesterol, LDL-C, HDL-C, triglyceride, 25 (OH) vitamin D, vitamin B12</li> <li>• Hormone and tumor markers: free T4, TSH, insulin, cortisol (S), free testosterone, <b>DHEA, IGF-1</b></li> <li>• Inflammation markers: hs-CRP, <b>GDF-15</b></li> </ul> |

- Genetic and muscle: **myostatin**, AMPK (phenotype)
  - Urine test: urine 10 (stick), urine microscopic
- ※ Variables in bold text were added in 2017

Abbreviations: BUN = blood urea nitrogen; AST = aspartate aminotransferase test; ALT = alanine aminotransferase test; GGT = gamma-glutamyl transferase; HDL = high-density lipoprotein; LDL = low-density lipoprotein; Hb A1c = hemoglobin A1c; WBC = white blood cell; RBC = red blood cell; Hb = hemoglobin, HCT = hematocrit test; MCV = mean corpuscular volume; MCH = mean corpuscular hemoglobin; MCHC = mean corpuscular hemoglobin concentration; HBs Ag = hepatitis B virus surface antigen; TSH = thyroid-stimulating hormone; Hs-CRP = high-sensitivity C-reactive protein; IGF-1 = insulin-like growth factor 1; DHEA = dehydroepiandrosterone; GDF-15 = growth/differentiation factor 15.

### *Frailty assessment*

To define physical frailty, the KFACS used a modified version of the Fried Frailty Phenotype (FFP) consisting of five components of frailty: unintended weight loss, weakness, self-reported exhaustion, slowness, and low physical activity [25].

- Unintentional weight loss: defined as a “yes” response to the question: “In the last year, have you lost more than 4.5 kg unintentionally?”
- Weakness: defined as the lower 20th percentile of grip strength (maximal grip strength in kg after measuring twice for each hand using a hand grip dynamometer [T.K.K.5401; Takei Scientific Instruments Co, Ltd., Tokyo, Japan]) stratified by sex

and

|  | Men                              | Women                            |     |
|--|----------------------------------|----------------------------------|-----|
|  | BMI $\leq 22 \dots \leq 25.0$ kg | BMI $\leq 23 \dots \leq 16.8$ kg | BMI |
|  | BMI 22.1–24... $\leq 27.0$ kg    | BMI 23.1–25... $\leq 17.7$ kg    |     |
|  | BMI 24.1–26... $\leq 27.8$ kg    | BMI 25.1–27... $\leq 17.8$ kg    |     |
|  | BMI $> 26 \dots \leq 28.5$ kg    | BMI $> 27 \dots \leq 17.7$ kg    |     |

quartiles based on the KFACS baseline survey.

- Self-reported exhaustion: defined as a “yes” response to either of the following statements from the Center for Epidemiological Studies-Depression scale on 3 or more days per week: “I felt that everything I did was an effort” and “I could not get going.”
- Slowness: Walking speed over 4 m was measured using an automatic timer (Gaitspeedometer; Dynamicphysiology, Daejeon, Korea), with acceleration and deceleration phases of 1.5 m. The mean values were selected after measuring twice. The lowest 20% of gait speed stratified by sex and height based on KFACS data was suggested as a cut-off.

| Men                                     | Women                                   |
|-----------------------------------------|-----------------------------------------|
| Height $\leq 165$ cm... $\leq 0.93$ m/s | Height $\leq 152$ cm... $\leq 0.85$ m/s |
| Height $> 165$ cm... $\leq 0.98$ m/s    | Height $> 152$ cm... $\leq 0.93$ m/s    |

- Low physical activity: energy expenditure estimates (kcal/week) were calculated using the IPAQ and metabolic equivalent scores were derived from vigorous, moderate, and mild activities in the questionnaire. Low physical activity level was defined as  $< 494.65$  kcal for men and  $< 283.50$  kcal for women, corresponding to the lowest 20% of the total energy consumed in a population-based Korean survey of older adults from among the general population [4].

1  
2  
3  
4 Total frailty scores (range: 0–5) were calculated by assigning a score of 1 to positive responses  
5  
6 on each of the above five components. Participants with a score of 0 were classified as “robust”,  
7  
8 a score of 1–2 as “prefrail”, and a score of 3–5 as “frail”.

### 11 *Data quality assurance*

12  
13  
14  
15 The study procedures were carried out by two clinical research investigators at each of  
16  
17 the 10 participating centers. The research investigators had been trained at Kyung Hee University  
18  
19 Medical Center by KFACS staff members every year and had taken tests to ensure standardized  
20  
21 quality. In addition, KFACS staff members visit the centers annually and monitor the  
22  
23 investigators’ performance based on the protocol, manual, and examination guidebook created  
24  
25 by the KFACS group.  
26  
27  
28

29 All data obtained from the questionnaires were sent to Kyung Hee University Medical  
30  
31 Center and managed by one medical record administrator.  
32  
33

## 34 **Findings to date**

### 35 *Sub-cohorts*

36  
37  
38  
39 The KFACS is unique not only because it is a cohort study of community-dwelling older  
40  
41 adults but also because it includes two sub-cohort studies a survey of social frailty and a nutrition  
42  
43 survey.  
44  
45

46  
47 The social frailty survey is a bimonthly telephone survey of a subgroup of the KFACS  
48  
49 cohort who participated in the second round of the KFACS baseline survey in 2017. From  
50  
51 September 2017 to February 2019, a total of 582 older adults provided additional informed  
52  
53 consent to participate in the bimonthly telephone interviews. Among the 582 participants, 433  
54  
55  
56

1  
2  
3  
4 completed the seventh survey (74.4% follow-up). The variables in this survey included health-  
5 related events (i.e., restricted activity), healthcare utilization (i.e., hospitalization, emergency  
6 department visits, and medical expenses), disability (i.e., physical functioning and IADL  
7 activity), and frailty (Tilburg Frailty Indicator), and social relationships (social network and  
8 social participation).  
9  
10  
11  
12  
13  
14  
15

16 To establish the nutritional sub-cohort, 1002 participants who gave informed consent  
17 were selected from among the KFACS participants in the first round considering the sampling  
18 criteria, i.e., the ratios of age and sex. The 24-h dietary recall method was used to assess dietary  
19 factors by home-visit personal interviews. In the nutritional survey, 1002 subjects from the first-  
20 round baseline (2016) KFACS cohort participated in 2016 – 2017, with 522 completing the 2-  
21 year follow-up survey conducted in 2018 – 2019.  
22  
23  
24  
25  
26  
27  
28  
29  
30

### 31 *Publications*

32 Among the social factors, the risk of frailty increased significantly when the frequency  
33 of contact with friends decreased [26]. Nutritional status (especially anorexia) was shown to  
34 increase the risk of frailty [27], the average daily intake of nutrients (adjusted for sex and age)  
35 was shown to decrease significantly with increasing severity of frailty, and frail subjects had  
36 significantly lower levels of protein, vitamin E, vitamin C, and calcium intake than robust  
37 subjects and subjects in the pre-frail stage [28]. Frailty was associated with long sleep latency in  
38 elderly male subjects and with sleeping for more than 8 h in elderly female subjects [29].  
39 Moreover, our previous study showed that moderate hearing loss was strongly associated with  
40 social frailty [30]. The prevalence of frailty was reported to increase with a daily sodium intake  
41 of > 3575 mg [31]. The self-administered health assessment tool, the EQ-VAS, was deemed  
42 appropriate as a frailty screening tool [32], and low calf circumference (< 32 cm) was shown to  
43  
44  
45  
46  
47  
48  
49  
50  
51  
52  
53  
54  
55  
56  
57  
58  
59  
60

1  
2  
3  
4 be strongly related to cognitive frailty in men [33].  
5  
6

7 In the baseline study of 2016 – 2017, 2907 of 3014 individuals fulfilled all five  
8 components of Fried's frailty phenotype. The results indicated that 7.8% of the participants (n =  
9 228) were frail, 47.0% (n = 1366) were pre-frail, and 45.2% (n = 1313) were robust (Table 4).  
10  
11 The prevalence of frailty increased with age in both sexes; in the group aged 70 – 74 years, 1.8%  
12 of men and 3.7% of women were frail, whereas in the 80 – 84 years age group, 14.9% of men  
13 and 16.7% of women were frail. Women tended to exhibit a higher prevalence of frailty than  
14 men in all age groups (Table 4).  
15  
16  
17  
18  
19  
20  
21  
22  
23  
24  
25  
26  
27  
28  
29  
30  
31  
32  
33  
34  
35  
36  
37  
38  
39  
40  
41  
42  
43  
44  
45  
46  
47  
48  
49  
50  
51  
52  
53  
54  
55  
56  
57  
58  
59  
60

**Table 4.** Characteristics of participants of the KFACS baseline survey, 2016 – 2017 according to Fried's frailty phenotype (n = 2907). Participants were sorted into three age groups (70 –74, 75 – 79, and 80 – 84 years).

| Variable                                                    | Total<br>(n=2,907) | Male<br>(n=1,383) | Female<br>(n=1,524) | Male             |                  |                  | <i>p</i> | Female           |                  |                  | <i>p</i> |
|-------------------------------------------------------------|--------------------|-------------------|---------------------|------------------|------------------|------------------|----------|------------------|------------------|------------------|----------|
|                                                             |                    |                   |                     | 70-74<br>(n=506) | 75-79<br>(n=529) | 80-84<br>(n=348) |          | 70-74<br>(n=649) | 75-79<br>(n=551) | 80-84<br>(n=324) |          |
| Frailty status according to Fried's phenotype, <i>n</i> (%) |                    |                   |                     |                  |                  |                  |          |                  |                  |                  |          |
| Robust                                                      | 1313 (45.2)        | 695 (50.3)        | 618 (40.6)          | 308 (60.9)       | 278 (52.6)       | 109 (31.3)       | < 0.001  | 318 (49.0)       | 223 (40.5)       | 77 (23.8)        | < 0.001  |
| Pre-frail                                                   | 1366 (47.0)        | 590 (42.7)        | 776 (50.9)          | 189 (37.4)       | 214 (40.5)       | 187 (53.7)       |          | 307 (47.3)       | 276 (50.1)       | 193 (59.6)       |          |
| Frail                                                       | 228 (7.8)          | 98 (7.1)          | 130 (8.5)           | 9 (1.8)          | 37 (7.0)         | 52 (14.9)        |          | 24 (3.7)         | 52 (9.4)         | 54 (16.7)        |          |
| Frailty phenotype, <i>n</i> (%)                             |                    |                   |                     |                  |                  |                  |          |                  |                  |                  |          |
| Unintentional weight loss (> 4.5 kg)                        | 142 (4.9)          | 75 (5.4)          | 67 (4.4)            | 18 (3.6)         | 34 (6.4)         | 23 (6.6)         | 0.062    | 22 (3.4)         | 26 (4.7)         | 19 (5.9)         | 0.181    |
| Low grip strength                                           | 602 (20.7)         | 283 (20.5)        | 319 (20.9)          | 53 (10.5)        | 92 (17.4)        | 138 (39.7)       | < 0.001  | 85 (13.1)        | 119 (21.6)       | 115 (35.5)       | < 0.001  |
| Self-reported exhaustion                                    | 971 (33.4)         | 323 (23.4)        | 648 (42.5)          | 95 (18.8)        | 128 (24.2)       | 100 (28.7)       | 0.004    | 239 (36.8)       | 229 (41.6)       | 180 (55.6)       | < 0.001  |
| Slowness                                                    | 625 (21.5)         | 297 (21.5)        | 328 (21.5)          | 67 (13.2)        | 101 (19.1)       | 129 (37.1)       | < 0.001  | 75 (11.6)        | 124 (22.5)       | 129 (39.8)       | < 0.001  |
| Low physical activity                                       | 325 (11.2)         | 155 (11.2)        | 170 (11.2)          | 37 (7.3)         | 53 (10.0)        | 65 (18.7)        | < 0.001  | 46 (7.1)         | 59 (10.7)        | 65 (20.1)        | < 0.001  |

## Strengths and limitations

The main strengths of the KFACS are 1) the inclusion of a nationwide population of community-dwelling Korean older adults; 2) a comprehensive scope of assessments, with the inclusion of physical examinations, health assessments, a neuropsychological battery for cognitive function, in-depth social function surveys, dental radiography, blood tests and banking, and most importantly, a diverse range of frailty and sarcopenia assessments; and 3) the inclusion of two sub-cohort studies i.e., a survey of social frailty involving bimonthly interviews and a nutrition survey involving home visits.

One weakness of the study is that the participants had to be ambulatory to visit the 10 centers in the baseline survey, and home-bound disabled or institutionalized persons could not participate. In addition, dementia patients with problems in communication were excluded. Second, the participants were not selected through probability sampling due to the strengthened data privacy laws that prevented researchers from acquiring the personal information of people living in the communities around the 10 centers. However, the distribution of sample characteristics (age, sex, education, place of residence) of KFACS participants was similar to the estimates of the older (70 – 84 years) population drawn from the national census.

Frailty is increasingly recognized as a major threat to healthy aging, and the KFACS is expected to be a valuable resource hub in identifying risk factors and building an evidence base for the prevention and management of frailty in community-dwelling older adults in Korea.

## Collaboration

KFACS questionnaires, manuals, and guidelines used in the study are provided for



1  
2  
3  
4 the purposes of policy and academic research upon request. All published articles and news  
5  
6 articles using the KFACS database, data provision manuals, and contact information are  
7  
8 available at the KFACS website (<http://www.kfacs.kr>). The KFACS cohort database and  
9  
10 blood samples are available to researchers, and the authors anticipate collaboration even with  
11  
12 foreign researchers, although approval from the Kyung Hee University Hospital IRB is  
13  
14 required to share the dataset or banked blood samples for all the researchers.  
15  
16

### 17 18 **Acknowledgements**

19  
20 We are grateful to the study participants and the staff of the Korean Frailty and Aging Cohort  
21  
22 Study (KFACS) for their cooperation.  
23  
24

### 25 26 **Contributors**

27  
28 The study protocol was designed by CWW, YL and JK, DC, SK, COK, MKK, BC, KMC,  
29  
30 ER, HCJ, SJS, JHL, YSP, SGL, BJK, HJK, and MK contributed on conceptual design and  
31  
32 obtained data. CWW, SL, YL, and MK drafted the manuscript and SL and KJL analyzed the  
33  
34 data. All authors participated in revision of the manuscript, and approved the final version.  
35  
36  
37

### 38 39 **Funding**

40  
41 This research was supported by a grant from the Korea Health Technology R & D Project  
42  
43 through the Korean Health Industry Development Institute (KHIDI), which is funded by the  
44  
45 Ministry of Health & Welfare, Republic of Korea (grant number: HI15C3153).  
46  
47  
48

### 49 50 **Ethics Statement**

51  
52 The KFACS protocol was approved by the institutional review boards (IRBs) of the  
53  
54 clinical research ethics committees of all 10 participating centers, including the coordinating  
55  
56 center, Kyung Hee University Hospital, Seoul, Korea (IRB number: 2015-12-103). All  
57  
58  
59  
60

1  
2  
3  
4 participants provided written informed consent. This report was exempted from approval by  
5  
6 the IRB of the Clinical Research Ethics Committee of Kyung Hee University Hospital (IRB  
7  
8 number: 2019-08-072).  
9  
10

### 11 **Competing interests**

12  
13  
14  
15 None declared.  
16

### 17 **Data sharing statement**

18  
19  
20 All published articles and news articles using the KFACS database, data provision manuals,  
21  
22 and contact information are available at the KFACS website (<http://www.kfacs.kr>). The  
23  
24 KFACS cohort database and blood samples are available to researchers, and the authors  
25  
26 anticipate collaboration even with international researchers, although approval from the  
27  
28 Kyung Hee University Hospital IRB is required to share the dataset or banked blood samples  
29  
30 for all the researchers.  
31  
32  
33  
34

### 35 **Open Access**

36  
37  
38 This is an Open Access article distributed in accordance with the Creative Commons  
39  
40 Attribution Non Commercial (CC BY-NC 4.0) license, which permits others to distribute,  
41  
42 remix, adapt, build upon this work non-commercially, and license their derivative works on  
43  
44 different terms, provided the original work is properly cited and the use is non-commercial.  
45  
46 See: <http://creativecommons.org/licenses/by-nc/4.0/>  
47  
48  
49  
50  
51  
52  
53  
54  
55  
56  
57  
58  
59  
60

## References

1. Korean Statistical Information Service. Korean Statistical Information Service (KOSIS) reports: 2018 the aged population panel. KOSIS, 2018.
2. Son J, Kim S, Won CW, et al. Physical frailty predicts medical expenses in community-dwelling, elderly patients: three-year prospective findings from living profiles of older people surveys in Korea. *European Geriatric Medicine*, 2015;6:412–6.
3. Ministry of Health and Welfare. *2017 The survey of living conditions and welfare needs of Korean older persons*. Seoul: Korean Institute for Health and Social Affairs, Ministry of Health and Welfare, 2008.
4. Ministry of Health and Welfare. *2008 Living profiles of older people survey in Korea*. Seoul: Korean Institute for Health and Social Affairs, Ministry of Health and Welfare, 2008.
5. Cesari M, Prince M, Thiyagarajan JA, et al. Frailty: an emerging public health priority. *Journal of the American Medical Directors Association*, 2016;17:188–92.
6. Park J, Lim S, Lim JY, et al. An overview of the Korean Longitudinal Study on Health and Aging. *Psychiatry Investigation*, 2007;4:84–95.
7. Lee EY, Kim HC, Rhee Y, et al. The Korean urban rural elderly cohort study: study design and protocol. *BMC Geriatrics*, 2014;14:33.
8. Jung HW, Jang IY, Lee YS, et al. Prevalence of frailty and aging-related health conditions in older Koreans in rural communities: a cross-sectional analysis of the Aging Study of Pyeongchang Rural Area. *Journal of Korean Medical Science*, 2016;31:345–52.
9. Won CW, Lee Y, Choi J, et al. Starting construction of Frailty Cohort for Elderly and Intervention Study. *Annals of Geriatric Medicine and Research*, 2016;20:114–117.
10. Oh JY, Yang YJ, Kim BS, et al. Validity and reliability of Korean version of International Physical Activity Questionnaire (IPAQ) short form. *Journal of the Korean Academy of Family Medicine*, 2007;28:532–541.
11. Alexander A, Bergman P, Hagströmer M, et al. IPAQ environmental module; reliability testing. *Journal of Public Health*, 2016;14:76–80.
12. Nestlé Nutrition Institute. *Mini Nutritional Assessment (MNA)*. Nestlé Nutrition Institute, 2009
13. Kim SH, Jo MW, Ahn J, et al. Assessment of psychometric properties of the Korean SF-12 v2 in the general population. *BMC Public Health*, 2014;14:1086.
14. Kim MH, Cho YS, Uhm WS, et al. Cross-cultural adaptation and validation of the Korean version of the EQ-5D in patients with rheumatic diseases. *Quality of Life Research*, 2005;14:1401–6.

15. The EuroQol Group. EuroQol - a new facility for the measurement of health-related quality of life. *Health Policy*, 1990;16:199–208.
16. Bae JN, Cho MJ. Development of the Korean version of the Geriatric Depression Scale and its short form among elderly psychiatric patients *Journal of Psychosomatic Research*, 2004;57:297–305.
17. Won CW, Yang KY, Rho YG, et al. The development of Korean Activities of Daily Living (K-ADL) and Korean Instrumental Activities of Daily Living (K-IADL) Scale. *Journal of the Korean Geriatrics Society*, 2002;6:107–20.
18. Jang SN, Cho SI, Ou SW, et al. The validity and reliability of Korean Fall Efficacy Scale (FES) and Activities-specific Balance Confidence Scale (ABC). *Journal of the Korean Geriatrics Society*, 2003;7:255–68.
19. Wenger GC, Tucker I. Using network variation in practice: identification of support network type. *Health and Social Care in the Community*, 2002;10:28–35.
20. Mitchell PH, Powell L, Blumenthal J, et al. A short social support measure for patients recovering from myocardial infarction. *Journal of Cardiopulmonary Rehabilitation*, 2003;23:398–403.
21. Shin N, Kang Y. The relationships among health locus of control and resilience, social support and health promoting behavior in patients with newly diagnosed coronary artery diseases. *Korean Journal of Adult Nursing*, 2015;27:294–303.
22. Ahn HJ, Chin J, Park A, et al. Seoul Neuropsychological Screening Battery-Dementia version (SNSB-D): A useful tool for assessing and monitoring cognitive impairments in dementia patients. *Journal of Korean Medical Science*, 2010;25:1071.
23. Lee DY, Lee KU, Lee JH, et al. A normative study of the CERAD neuropsychological assessment battery in the Korean elderly. *Journal of the International Neuropsychological Society*, 2004;10:72–81.
24. Kim TH, Huh Y, Choe JY, et al. Korean Version of Frontal Assessment Battery: psychometric properties and normative data. *Dementia and Geriatric Cognitive Disorders*, 2010;29:363–70.
25. Fried LP, Tangen CM, Walston J, et al. Frailty in older adults: evidence for a phenotype. *The Journals of Gerontology Series A: Biological Sciences and Medical Sciences*, 2001;56:M146–56.
26. Chon D, Lee Y, Kim J, et al. The association between frequency of social contact and frailty in older people: Korean Frailty and Aging Cohort Study (KFACS). *Journal of Korean Medical Science*, 2018;33:e332.
27. Kim J, Lee Y, Won CW, et al. Nutritional status and frailty in community-dwelling older Korean adults: the Korean Frailty and Aging Cohort Study. *The Journal of Nutrition, Health & Aging*, 2018;22:774–8.

- 1  
2  
3  
4  
5  
6  
7  
8  
9  
10  
11  
12  
13  
14  
15  
16  
17  
18  
19  
20  
21  
22  
23  
24  
25  
26  
27  
28  
29  
30  
31  
32  
33  
34  
35  
36  
37  
38  
39  
40  
41  
42  
43  
44  
45  
46  
47  
48  
49  
50  
51  
52  
53  
54  
55  
56  
57  
58  
59  
60
28. Park Y, Lee Y. Association between protein intake and frailty in the Korean elderly of KFACS. *Annals of Nutrition & Metabolism*, 2017;71:616.
  29. Kang I, Kim S, Kim BS, et al. Sleep latency in men and sleep duration in women can be frailty markers in community-dwelling older adults: the Korean Frailty and Aging Cohort Study (KFACS). *The Journal of Nutrition, Health & Aging*, 2018;23:63–7.
  30. Yoo M, Kim S, Kim B, et al. Moderate hearing loss is related with social frailty in community-dwelling older adults: the Korean Frailty and Aging Cohort Study (KFACS). *Archives of Gerontology and Geriatrics*, 2019;83:126–30.
  31. Kim S, Kim M, Min J, et al. How much intake of sodium is good for frailty? The Korean Frailty and Aging Cohort Study (KFACS). *The Journal of Nutrition, Health & Aging*, 2019; 23:503–8.
  32. Kim S, Won CW, Kim BS, et al. EuroQol Visual Analogue Scale (EQ-VAS) as a predicting tool for frailty in older Korean adults: the Korean Frailty and Aging Cohort Study (KFACS). *The Journal of Nutrition, Health & Aging*, 2018;22:1275–80.
  33. Kim M, Jeong M, Yoo J, et al. Calf circumference as a screening tool for cognitive frailty in community-dwelling older adults: the Korean Frailty and Aging Cohort Study (KFACS). *Journal of Clinical Medicine*, 2018;7:332

# BMJ Open

## Cohort Profile: Korean Frailty and Aging Cohort Study (KFACTS)

|                                 |                                                                                                                                                                                                                                                                                                                                                                                                                                                                                                                                                                                                                                                                                                                                                                                                                                                                                                                                                                                                                                                                                                                                                                                                                                                                                                                                                                                  |
|---------------------------------|----------------------------------------------------------------------------------------------------------------------------------------------------------------------------------------------------------------------------------------------------------------------------------------------------------------------------------------------------------------------------------------------------------------------------------------------------------------------------------------------------------------------------------------------------------------------------------------------------------------------------------------------------------------------------------------------------------------------------------------------------------------------------------------------------------------------------------------------------------------------------------------------------------------------------------------------------------------------------------------------------------------------------------------------------------------------------------------------------------------------------------------------------------------------------------------------------------------------------------------------------------------------------------------------------------------------------------------------------------------------------------|
| Journal:                        | <i>BMJ Open</i>                                                                                                                                                                                                                                                                                                                                                                                                                                                                                                                                                                                                                                                                                                                                                                                                                                                                                                                                                                                                                                                                                                                                                                                                                                                                                                                                                                  |
| Manuscript ID                   | bmjopen-2019-035573.R1                                                                                                                                                                                                                                                                                                                                                                                                                                                                                                                                                                                                                                                                                                                                                                                                                                                                                                                                                                                                                                                                                                                                                                                                                                                                                                                                                           |
| Article Type:                   | Cohort profile                                                                                                                                                                                                                                                                                                                                                                                                                                                                                                                                                                                                                                                                                                                                                                                                                                                                                                                                                                                                                                                                                                                                                                                                                                                                                                                                                                   |
| Date Submitted by the Author:   | 20-Jan-2020                                                                                                                                                                                                                                                                                                                                                                                                                                                                                                                                                                                                                                                                                                                                                                                                                                                                                                                                                                                                                                                                                                                                                                                                                                                                                                                                                                      |
| Complete List of Authors:       | <p>Won, Chang Won; Kyung Hee University School of Medicine<br/> Lee, Seoyoon; Kyung Hee University Medical Center, ; Yonsei University,<br/> <br/> Kim, Jinhee; Ajou University<br/> Chon, Doukyoung ; Korea University College of Medicine and School of<br/> Medicine, Preventive Medicine<br/> Kim, Sunyoung; Kyung Hee University Medical Center<br/> Kim, Chang-O; Sungkonghoe University<br/> Kim, Mi Kyung; Hanyang University College of Medicine, Preventive<br/> Medicine<br/> Cho, BeLong; Seoul National University Hospital<br/> Choi, Kyung Mook; Korea University<br/> Roh, Eun; Korea University<br/> Jang, Hak Chul; Seoul National University Bundang Hospital<br/> Son, Sang Joon; Ajou University<br/> Lee, Jin-Hee; Catholic University of Korea<br/> Park, Yong Soon; Hallym University<br/> Lee, Sam-Gyu ; Chonnam National University Medical School,<br/> Department of Physical and Rehabilitation Medicine<br/> Kim, Bong Jo; Gyeongsang National University<br/> Kim, Hyeon Ju ; Jeju National University College of Medicine and<br/> Graduate School of Medicine, Family Medicine; Jeju National University<br/> Choi, J; Konkuk University<br/> Ga, Hyuk; Institute of Geriatric Medicine, Incheon Eun-Hye Hospital<br/> Lee, Kee Jae; Korea National Open University<br/> Lee, Yunhwan; Ajou University<br/> Kim, Miji; Kyung Hee University</p> |
| <b>Primary Subject Heading</b>: | Geriatric medicine                                                                                                                                                                                                                                                                                                                                                                                                                                                                                                                                                                                                                                                                                                                                                                                                                                                                                                                                                                                                                                                                                                                                                                                                                                                                                                                                                               |
| Secondary Subject Heading:      | Geriatric medicine, Public health                                                                                                                                                                                                                                                                                                                                                                                                                                                                                                                                                                                                                                                                                                                                                                                                                                                                                                                                                                                                                                                                                                                                                                                                                                                                                                                                                |
| Keywords:                       | GERIATRIC MEDICINE, PREVENTIVE MEDICINE, PUBLIC HEALTH                                                                                                                                                                                                                                                                                                                                                                                                                                                                                                                                                                                                                                                                                                                                                                                                                                                                                                                                                                                                                                                                                                                                                                                                                                                                                                                           |
|                                 |                                                                                                                                                                                                                                                                                                                                                                                                                                                                                                                                                                                                                                                                                                                                                                                                                                                                                                                                                                                                                                                                                                                                                                                                                                                                                                                                                                                  |

1  
2  
3  
4  
5  
6  
7  
8  
9  
10  
11  
12  
13  
14  
15  
16  
17  
18  
19  
20  
21  
22  
23  
24  
25  
26  
27  
28  
29  
30  
31  
32  
33  
34  
35  
36  
37  
38  
39  
40  
41  
42  
43  
44  
45  
46  
47  
48  
49  
50  
51  
52  
53  
54  
55  
56  
57  
58  
59  
60

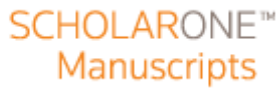

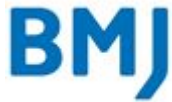

I, the Submitting Author has the right to grant and does grant on behalf of all authors of the Work (as defined in the below author licence), an exclusive licence and/or a non-exclusive licence for contributions from authors who are: i) UK Crown employees; ii) where BMJ has agreed a CC-BY licence shall apply, and/or iii) in accordance with the terms applicable for US Federal Government officers or employees acting as part of their official duties; on a worldwide, perpetual, irrevocable, royalty-free basis to BMJ Publishing Group Ltd ("BMJ") its licensees and where the relevant Journal is co-owned by BMJ to the co-owners of the Journal, to publish the Work in this journal and any other BMJ products and to exploit all rights, as set out in our [licence](#).

The Submitting Author accepts and understands that any supply made under these terms is made by BMJ to the Submitting Author unless you are acting as an employee on behalf of your employer or a postgraduate student of an affiliated institution which is paying any applicable article publishing charge ("APC") for Open Access articles. Where the Submitting Author wishes to make the Work available on an Open Access basis (and intends to pay the relevant APC), the terms of reuse of such Open Access shall be governed by a Creative Commons licence – details of these licences and which [Creative Commons](#) licence will apply to this Work are set out in our licence referred to above.

Other than as permitted in any relevant BMJ Author's Self Archiving Policies, I confirm this Work has not been accepted for publication elsewhere, is not being considered for publication elsewhere and does not duplicate material already published. I confirm all authors consent to publication of this Work and authorise the granting of this licence.



1  
2  
3  
4 **Title Page: Cohort Profile**  
5

6  
7 **Title: Cohort Profile: Korean Frailty and Aging Cohort Study (KFACS)**  
8  
9

10  
11 **Authors:**  
12

13 **Chang Won Won**<sup>1,2</sup>, **Seoyoon Lee**<sup>1,3</sup>, Jinhee Kim<sup>4</sup>, Doukyoung Chon<sup>5</sup>, Sunyoung Kim<sup>2</sup>, Chang-  
14 O Kim<sup>6</sup>, Mi Kyung Kim<sup>7</sup>, Belong Cho<sup>8</sup>, Kyung Mook Choi<sup>9</sup>, Eun Roh<sup>9</sup>, Hak Chul Jang<sup>10</sup>, Sang  
15 Joon Son<sup>11</sup>, Jin-Hee Lee<sup>12</sup>, Yong Soon Park<sup>13</sup>, Sam-Gyu Lee<sup>14</sup>, Bong Jo Kim<sup>15</sup>, Hyeon ju Kim<sup>16</sup>,  
16 Jaekyung Choi<sup>17</sup>, Hyuk Ga<sup>18</sup>, Kee Jae Lee<sup>19</sup>, Yunhwan Lee<sup>4\*</sup>, Miji Kim<sup>20\*</sup>, and the KFACS  
17 Group  
18  
19

20 <sup>1</sup> Elderly Frailty Research Center, Department of Family Medicine, College of Medicine, Kyung  
21 Hee University, Seoul, Republic of Korea

22 <sup>2</sup> Department of Family Medicine, Kyung Hee University Medical Center, Seoul, Republic of  
23 Korea  
24

25 <sup>3</sup> School of Social Welfare, Yonsei University, Seoul, Republic of Korea

26 <sup>4</sup> Department of Preventive Medicine and Public Health, Ajou University School of Medicine,  
27 Suwon, Republic of Korea  
28

29 <sup>5</sup> Department of Preventive Medicine, Korea University College of Medicine, Seoul, Republic of  
30 Korea  
31

32 <sup>6</sup> Institute of Social Welfare, SungKongHoe University, Seoul, Korea

33 <sup>7</sup> Department of Preventive Medicine, Hanyang University, College of Medicine, Seoul,  
34 Republic of Korea  
35

36 <sup>8</sup> Department of Family Medicine, Center for Health Promotion and Optimal Aging, Seoul  
37 National University College of Medicine & Hospital, Seoul, Republic of Korea

38 <sup>9</sup> Division of Endocrinology and Metabolism, Department of Internal Medicine, Korea  
39 University, Seoul, Republic of Korea

40 <sup>10</sup> Department of Internal Medicine, Seoul National University Bundang Hospital, Seoul  
41 National University, College of Medicine, Seongnam, Korea  
42

43 <sup>11</sup> Department of Psychiatry, Ajou University School of Medicine, Suwon, Republic of Korea

44 <sup>12</sup> Catholic institute of U-healthcare, The Catholic University of Korea, Seoul, Republic of Korea

45 <sup>13</sup> Department of Family Medicine, Hallym University Chuncheon Sacred Heart Hospital,  
46 Chuncheon, Republic of Korea  
47

48 <sup>14</sup> Department of Physical & Rehabilitation Medicine, Chonnam National University Medical  
49 School, Gwangju, Republic of Korea

50 <sup>15</sup> Department of Psychiatry, College of Medicine, Gyeongsang National University, Jinju,  
51 Republic of Korea  
52

53 <sup>16</sup> Department of Family Medicine, Jeju National University School of Medicine, Jeju, Republic  
54 of Korea

55 <sup>17</sup> Department of Family Medicine, Research Institute of Medical Science, Konkuk University  
56  
57

1  
2  
3  
4 Medical Center, Konkuk University School of Medicine, Seoul, Republic of Korea  
5  
6 <sup>18</sup> Institute of Geriatric Medicine, Incheon Eun-Hye Hospital, Incheon, Republic of Korea  
7 <sup>19</sup> Department of Information and Statistics, Korea National Open University, Seoul, Republic of  
8 Korea  
9 <sup>20</sup> Department of Biomedical Science and Technology, College of Medicine, East-West Medical  
10 Research Institute, Kyung Hee University, Seoul, Republic of Korea  
11  
12

### 13 14 **Corresponding author:**

15  
16 Yunhwan Lee\*, MD, DrPH

17  
18 \*Corresponding author: Department of Preventive medicine and Public Health, Ajou University  
19 School of Medicine, Suwon, Republic of Korea. Email: [yhlee@ajou.ac.kr](mailto:yhlee@ajou.ac.kr)  
20

21  
22 Miji Kim\*, PhD

23  
24 \*Corresponding author: Department of Biomedical Science and Technology, College of  
25 Medicine, East-West Medical Research Institute, Kyung Hee University, Seoul, Republic of  
26 Korea. Email: [mijiak@khu.ac.kr](mailto:mijiak@khu.ac.kr)  
27  
28  
29  
30  
31  
32  
33  
34

35  
36 Table 1. General characteristics of participants in the Korean Frailty and Aging Cohort Study (KFACS)  
37 baseline survey, 2016 – 2017. Participants were sorted into three age groups (70 –74, 75 – 79, and 80 – 84  
38 years).  
39

40 Table 2. Summary of variables collected from the Korean Frailty and Aging Cohort Study (KFACS) at  
41 baseline (2016-2017) and the first follow-up period (2019-2020)  
42

43 Table 3. List of laboratory test variables collected during the Korean Frailty and Aging Cohort  
44 Study (KFACS) baseline survey (2016 – 2017)  
45

46 Table 4. Characteristics of participants of the KFACS baseline survey, 2016 – 2017 according to Fried's  
47 frailty phenotype (n = 2907). Participants were sorted into three age groups (70 –74, 75 – 79, and 80 – 84  
48 years).  
49

50 Figure 1. Locations of the 10 centers involved in the Korean Frailty and Aging Cohort Study  
51 (KFACS) - (File type: PDF) is uploaded separately.  
52  
53  
54

55 Word count: 3,631  
56

## Abstract

**Purpose** The purpose of the Korean Frailty and Aging Cohort Study (KFACS) is to initiate a nationwide, population-based prospective cohort study of older adults living in the community to assess their frailty status and explore transitions between frailty states over time in Korea.

**Participants** The KFACS is a multicenter longitudinal study with the baseline survey conducted from May 2016 to November 2017. Each center recruited participants using quota sampling stratified by age and sex. The number of participants recruited through 2 years of baseline study from 10 centers was 3014, with each site accounting for approximately 300 participants. The inclusion criteria were: having an age of 70 – 84 years, currently living in the community, having no plans to move out in the next 2 years, having no problems with communication, and no prior dementia diagnosis.

**Findings to date** To define physical frailty, the KFACS used a modified version of the Fried Frailty Phenotype (FFP) consisting of five components of frailty: unintended weight loss, weakness, self-reported exhaustion, slowness, and low physical activity. In the baseline study of 2016–2017, 2907 of 3014 individuals fulfilled all five components of Fried’s frailty phenotype. The results indicated that 7.8% of the participants (n=228) were frail, 47.0% (n=1366) were pre-frail, and 45.2% (n=1313) were robust. The prevalence of frailty increased with age in both sexes; in the group aged 70–74 years, 1.8% of men and 3.7% of women were frail, whereas in the 80–84 years age group, 14.9% of men and 16.7% of women were frail. Women tended to exhibit a higher prevalence of frailty than men in all age groups.

**Future plans** The KFACS plans to identify outcomes and risk factors associated with frailty by conducting a 10-year cohort study, with a follow-up every 2 years, using 3014 baseline participants.

**Key words:** Frailty, cohort studies, aging, older adults, Republic of Korea

## Strengths and limitations of this study

- The main strengths of the KFACS are the inclusion of a nationwide population of community-dwelling Korean older adults.
- The KFACS has a comprehensive scope of assessments, with the inclusion of physical examinations, health assessments, a neuropsychological battery for cognitive function, in-depth social function surveys, dental radiography, blood tests and banking, and most importantly, a diverse range of frailty and sarcopenia assessments.
- All the data are available and open to all researchers.
- The KFACS includes two sub-cohort studies i.e., a survey of social frailty involving bimonthly interviews and a nutrition survey involving home visits.
- One weakness of the study is that the participants had to be ambulatory to visit the 10 centers in the baseline survey, and home-bound disabled or institutionalized persons could not participate.

## Introduction

The population of Korea is aging rapidly, with more than 14% of the total population in Korea consisting of people older than 65 years according to the 2018 Aged Population Report created by the Korean Statistical Information Service. The proportion of the aged in the population is projected to increase to 24.5% by 2030 and 41.0% by 2060 [1]. The percentage of

1  
2  
3  
4 the population older than 75 years is estimated to reach 10.0% by 2030 and 25.9% by 2060, with  
5  
6 the percentage of the population aged 85 years and older predicted to increase to 2.8% and  
7  
8 11.2% by these dates, respectively [1,2]. Aging of the population is accompanied by increased  
9  
10 rates of multimorbidity along with increased need for social support, as well as increased burden  
11  
12 on families and public health medical expenditure [3,4]. Many recent studies increasingly  
13  
14 identify frailty as a major threat to healthy aging, as frailty prevalence increases with age [5-7].  
15  
16 An increasing proportion of community-dwelling older adults present frailty, a status of extreme  
17  
18 vulnerability to endogenous and exogenous stressors exposing the individual to increased risk of  
19  
20 negative health-related outcomes [5]. Therefore, it is becoming increasingly important to develop  
21  
22 means of identifying frailty, which represents a transition phase between healthy aging and  
23  
24 disability, as well as develop interventions to prevent adverse outcomes [7].  
25  
26  
27  
28  
29

30 Although many Korean cohort studies on age-related health conditions for older adults  
31  
32 have been reported, such as the Korean Longitudinal Study on Health and Aging (KLoSHA) [8],  
33  
34 Korean Urban and Rural Elderly (KURE) cohort study [9], and Aging Study of Pyeongchang  
35  
36 Rural Area (ASPRA) [10], none focused on frailty in older adults on a nationwide scale. With a  
37  
38 focus on evidence-based diagnosis and management methods of frailty in community-dwelling  
39  
40 older adults, the Korean Frailty and Aging Cohort Study (KFACS) was instigated with funding  
41  
42 from the Ministry of Health and Welfare in December 2015 [6]. Because the KFACS will be the  
43  
44 first study to examine frailty specifically in a cohort of Korean subjects, it has several important  
45  
46 implications for older Korean adults. Firstly, the KFACS will provide the natural history of  
47  
48 frailty in Korea, which has never been studied. Secondly, the KFACS was constructed with in-  
49  
50 depth considerations of the demographic characteristics of Korean adults – one of the fastest  
51  
52 growing aging populations in the world. The KFACS specifically takes into account the rapid  
53  
54  
55  
56  
57  
58  
59  
60

1  
2  
3  
4 trend of increasing life expectancy and the corresponding increase in supportive care  
5 expenditures [11]. Moreover, several potential risk factors for frailty are also considered  
6 including: nutrition (older Korean adults have relatively poor nutritional statuses, specifically  
7 consuming lower levels of protein and calcium, and having higher sodium intakes) [12], physical  
8 function (sedentary lifestyle) [11], and social aspects (high poverty and depression rates, and low  
9 social activity and participation rates) [11, 13-14]. The purpose of KFACS is to initiate a  
10 nationwide, population-based prospective cohort study of older adults living in the community to  
11 assess their frailty status and explore transitions between frailty states over time. The specific  
12 aims of the study were to 1) identify risk factors involved in the transition between states of  
13 frailty and the development of adverse outcomes, such as disability, institutionalization, and  
14 mortality; 2) develop models for predicting the onset and progression of frailty; and 3) create an  
15 evidence base for developing clinical practice guidelines for the prevention and management of  
16 frailty in older adults [6].  
17  
18  
19  
20  
21  
22  
23  
24  
25  
26  
27  
28  
29  
30  
31  
32  
33

### 34 **Cohort description**

35  
36  
37  
38 The KFACS is a multicenter longitudinal study with the baseline survey conducted from  
39 May 2016 to November 2017. The participants were recruited from among community-dwelling  
40 residents in urban and rural areas nationwide in 10 study centers across different regions  
41 covering different residential locations (urban, suburban, and rural) —three from Seoul  
42 Metropolitan Area, two from Gyeonggi Province, and one from each of Gangwon Province,  
43 Chungcheong-buk Province, Jeolla-nam Province, Gyeongsang-nam Province, and Jeju Island in  
44 South Korea (Figure 1).  
45  
46  
47  
48  
49  
50  
51  
52

53  
54 Each center recruited participants using quota sampling stratified by age (70 – 74, 75 –  
55  
56  
57  
58  
59  
60

1  
2  
3  
4 79, and 80 – 84 years with a ratio of 6:5:4, respectively) and sex (male and female), with the aim  
5  
6 of recruiting 1500 men and 1500 women. Participants were recruited from diverse settings (local  
7  
8 senior welfare centers, community health centers, apartments, housing complexes, and outpatient  
9  
10 clinics) to minimize selection bias. By reference, the prevalence of frailty among adults between  
11  
12 65 and 70 was 3.7% based on living profiles of older people survey in 2008 in Korea. The  
13  
14 prevalence was 7.4%, 11.6%, and 15.4% on 70-74, 75-79, and 80-84, respectively [4]. Due to its  
15  
16 relatively small number, and the suggestion from the frailty consensus, which states that all  
17  
18 persons older than 70 years should be screened for frailty, we have set the starting age from 70 to  
19  
20 84 for this study [7]. Persons over 85 years of age were excluded for having relatively higher  
21  
22 difficulty in their center visit and follow-up surveys. Additionally, the advanced age of  
23  
24 participants over 85 has a higher probability of affecting the frailty statuses of these individuals,  
25  
26 possibly hindering the identification of physical frailty-associated risk factors. We intentionally  
27  
28 recruited relatively healthy community-dwelling older adults living in the community in this  
29  
30 study by mostly recruiting participants who were able to visit the clinical sites. The inclusion  
31  
32 criteria of KFACS participants were therefore: aged 70 – 84 years, currently living in the  
33  
34 community, having no plans to move out in the next 2 years, and having no problems with  
35  
36 communication and no prior dementia diagnosis. In this case, “move out” refers to relocating to  
37  
38 areas outside the three neighboring towns above.  
39  
40  
41  
42  
43  
44  
45

46 Of the 3014 participants, 1559 (51.7%) joined the study in 2016 and 1455 (48.3%)  
47  
48 joined in 2017. The mean age was 76.0 years, and 1582 participants (52.5%) were female.  
49  
50 Overall, 39.4% were aged 70–74 years, 37.4% were aged 75 – 79 years, and 23.2% were in their  
51  
52 80s. The baseline survey indicated that 28% of the subjects were urban residents, 42% were  
53  
54 suburban residents, and 30% were residents of rural areas (Table 1). Other general characteristics  
55  
56  
57

1  
2  
3  
4 of the KFACS participants are shown in Table 1.  
5  
6

7 *Patient and Public Involvement*  
8  
9

10 This study was completed without participant involvement. The participants were not  
11 invited to contribute the development of the design, recruitment, questionnaires of the KFACS  
12 nor to have commitment to the results of this study. All participants were informed of the use of  
13 the data for research in this study. We have informed the participants of the main results of their  
14 blood, urine, Chest X-ray, DEXA, Electrocardiography, and cognitive function tests. We have  
15 plans to disseminate the results of the study: (a) develop the guidelines for the prevention and  
16 management of physical frailty based on the results from the KFACS data and disclose to the  
17 public, and (b) provide printed materials on the main results of the KFACS to the participants.  
18  
19  
20  
21  
22  
23  
24  
25  
26  
27  
28  
29  
30  
31  
32  
33  
34  
35  
36  
37  
38  
39  
40  
41  
42  
43  
44  
45  
46  
47  
48  
49  
50  
51  
52  
53  
54  
55  
56  
57  
58  
59  
60



**Table 1.** General characteristics of participants in the Korean Frailty and Aging Cohort Study (KFACTS) baseline survey, 2016 – 2017. Participants were sorted into three age groups (70 –74, 75 – 79, and 80 – 84 years).

| Variable                                          | Total         | Male (n=1,432) |               |               | p-value | Female (n=1,582) |              |              | p-value |
|---------------------------------------------------|---------------|----------------|---------------|---------------|---------|------------------|--------------|--------------|---------|
|                                                   |               | 70-74          | 75-79         | 80-84         |         | 70-74            | 75-79        | 80-84        |         |
| Total baseline study participants, <i>n</i> (%)   | 3014 (100)    | 521 (17.3)     | 552 (18.3)    | 359 (11.9)    |         | 668 (22.2)       | 574 (19)     | 340 (11.3)   |         |
| 2016, <i>n</i> (%)                                | 1559 (51.7)   | 267 (8.9)      | 280 (9.3)     | 187 (6.2)     |         | 338 (11.2)       | 297 (9.9)    | 190 (6.3)    |         |
| 2017, <i>n</i> (%)                                | 1455 (48.3)   | 254 (8.4)      | 272 (9)       | 172 (5.7)     |         | 330 (10.9)       | 277 (9.2)    | 150 (5)      |         |
| Demographics, <i>n</i> (%)                        |               |                |               |               |         |                  |              |              |         |
| Marital Status                                    |               |                |               |               |         |                  |              |              |         |
| Single                                            | 4 (0.1)       | 2 (0.4)        | 0 (0.0)       | 1 (0.3)       |         | 1 (0.1)          | 0 (0.0)      | 0 (0.0)      |         |
| Married                                           | 2929 (97.3)   | 505 (97.1)     | 536 (97.3)    | 350 (97.5)    | 0.697   | 645 (96.6)       | 561 (97.7)   | 332 (97.9)   | .520    |
| Divorced/widowed                                  | 78 (2.6)      | 13 (2.5)       | 15 (2.7)      | 8 (2.2)       |         | 22 (3.3)         | 13 (2.3)     | 7 (2.1)      |         |
| Residence area                                    |               |                |               |               |         |                  |              |              |         |
| Urban                                             | 827 (27.6)    | 137 (26.5)     | 146 (26.6)    | 106 (29.5)    |         | 186 (28)         | 160 (28.1)   | 92 (27.1)    |         |
| Suburban                                          | 1262 (42.1)   | 211 (40.8)     | 223 (40.6)    | 140 (39)      | 0.877   | 291 (43.8)       | 262 (46.0)   | 135 (39.8)   | .224    |
| Rural                                             | 909 (30.3)    | 169 (32.7)     | 180 (32.8)    | 113 (31.5)    |         | 187 (28.2)       | 148 (26.0)   | 112 (33.0)   |         |
| Education                                         |               |                |               |               |         |                  |              |              |         |
| < Middle school                                   | 1452 (48.2)   | 150 (28.8)     | 169 (30.6)    | 127 (35.5)    |         | 383 (57.3)       | 365 (63.7)   | 258 (75.9)   |         |
| Middle and high school                            | 1048 (34.8)   | 235 (21.1)     | 226 (17.6)    | 140 (12.3)    | 0.024   | 218 (16.2)       | 155 (11.9)   | 74 (10.9)    | < 0.001 |
| ≥ College                                         | 512 (17.0)    | 136 (50.1)     | 157 (51.8)    | 91 (52.2)     |         | 67 (26.5)        | 53 (24.4)    | 8 (13.2)     |         |
| Receiving basic living subsidy, yes, <i>n</i> (%) | 166 (5.5)     | 31 (6.0)       | 20 (3.6)      | 22 (6.1)      | 0.132   | 30 (4.5)         | 26 (4.5)     | 37 (10.9)    | < 0.001 |
| Receiving medical aid, yes, <i>n</i> (%)          | 45 (1.5)      | 4 (0.8)        | 6 (1.1)       | 4 (1.1)       | 0.829   | 9 (1.3)          | 11 (1.9)     | 11 (3.2)     | 0.124   |
| Lifestyle characteristics                         |               |                |               |               |         |                  |              |              |         |
| Current drinker, <i>n</i> (%)                     | 890 (41.2)    | 269 (56.8)     | 273 (54.7)    | 169 (52.6)    | 0.517   | 80 (19.7)        | 61 (21.4)    | 38 (21.6)    | 0.812   |
| Current smoker, <i>n</i> (%)                      | 174 (15.1)    | 61 (14.8)      | 56 (13.3)     | 41 (15.0)     | 0.775   | 2 (11.8)         | 4 (40.0)     | 10 (52.6)    | 0.034   |
| Sleeping (h/day), mean (SD)                       | 6.24 (1.47)   | 6.43 (1.39)    | 6.54 (1.31)   | 6.54 (1.50)   | 0.354   | 6.06 (1.47)      | 5.87 (1.50)  | 6.08 (1.54)  | 0.056   |
| Physical activity (METS/week), mean (SD)          | 52.45 (63.58) | 71.52 (85.37)  | 66.08 (68.75) | 46.52 (54.89) | < 0.001 | 51.01 (59.48)    | 39.5 (43.72) | 32.6 (46.61) | < 0.001 |
| Body composition, mean (SD)                       |               |                |               |               |         |                  |              |              |         |
| Calf circumference (cm)                           | 33.8(2.7)     | 35.2(2.2)      | 34.7(2.6)     | 33.7(2.7)     | < 0.001 | 33.7(2.4)        | 32.6(2.5)    | 32.3(2.6)    | < 0.001 |
| Waist circumference (cm)                          | 87.7(8.6)     | 88.9(8.1)      | 88.3 (8.7)    | 88.5(9.1)     | 0.530   | 86.4(8.0)        | 87.1(8.4)    | 87.4(9.4)    | 0.116   |
| BMI (kg/m <sup>2</sup> )                          | 24.4(3.0)     | 24.2(2.8)      | 23.8(3.0)     | 23.7(3.0)     | 0.008   | 24.9(2.9)        | 24.9(3.1)    | 24.7(3.4)    | 0.687   |
| Physical function                                 |               |                |               |               |         |                  |              |              |         |
| Timed up-and-go (s), mean (SD)                    | 10.5 (2.9)    | 9.5 (2.7)      | 10.4 (2.5)    | 11.1 (2.7)    | < 0.001 | 9.9 (2.2)        | 10.8 (3.2)   | 12.5 (3.5)   | < 0.001 |
| ADL disability, <i>n</i> (%)                      | 337 (11.2)    | 32 (6.1)       | 42 (7.6)      | 41 (11.4)     | 0.016   | 64 (9.6)         | 86 (15.0)    | 72 (21.2)    | < 0.001 |
| IADL disability, <i>n</i> (%)                     | 1148 (38.1)   | 311 (59.7)     | 303 (54.9)    | 219 (61.0)    | 0.128   | 101 (15.1)       | 107 (18.6)   | 107 (31.5)   | < 0.001 |
| Fall experience, yes, <i>n</i> (%)                | 612 (20.3)    | 67 (12.9)      | 96 (17.4)     | 65 (18.1)     | 0.055   | 136 (20.4)       | 160 (27.9)   | 88 (25.9)    | 0.006   |
| SPPB, mean (SD)                                   | 3.74 (1.28)   | 3.32 (0.83)    | 3.58 (1.43)   | 3.92 (1.14)   | < 0.001 | 3.54 (0.87)      | 3.88 (1.28)  | 4.58 (1.84)  | < 0.001 |
| Grip strength (kg), mean (SD)                     | 26.2 (7.6)    | 34.2 (5.6)     | 32.2 (5.8)    | 28.8 (5.4)    | < 0.001 | 22 (4.0)         | 20.7 (4.1)   | 18.9 (3.9)   | < 0.001 |

|    |                                                |             |             |             |             |         |             |             |             |         |
|----|------------------------------------------------|-------------|-------------|-------------|-------------|---------|-------------|-------------|-------------|---------|
| 1  | Gait speed (m/s), mean (SD)                    | 1.1 (0.26)  | 1.21 (0.25) | 1.16 (0.27) | 1.04 (0.24) | < 0.001 | 1.14 (0.23) | 1.05 (0.22) | 0.92 (0.22) | < 0.001 |
| 2  | Psychological function, mean (SD)              |             |             |             |             |         |             |             |             |         |
| 3  | Self-rated health (range: 0 – 100)             | 73.9(17.4)  | 77.7(14.5)  | 76.2(15.3)  | 72.4(16.4)  | < 0.001 | 74.7(17.8)  | 71.8(18.6)  | 67.8(20.7)  | < 0.001 |
| 4  | GDS (range: 0 – 15)                            | 3.3 (3.7)   | 2 (3.0)     | 2.5 (3.4)   | 3.1 (3.3)   | < 0.001 | 3.4 (3.7)   | 4.1 (4.1)   | 4.9 (4.3)   | < 0.001 |
| 5  | EQ-5D (range: 0 – 1)                           | 0.9 (0.1)   | 0.0(0.1)    | 0.9 (0.1)   | 0.9 (0.1)   | < 0.001 | 0.9 (0.1)   | 0.8 (0.1)   | 0.8 (0.2)   | < 0.001 |
| 6  | Cognitive function, mean (SD)                  |             |             |             |             |         |             |             |             |         |
| 7  | MMSE-KC (range: 0 – 30)                        | 25.5 (3.4)  | 26.8 (2.4)  | 26.1 (3.1)  | 25.3 (3.6)  | < 0.001 | 25.9 (3.2)  | 24.8 (3.4)  | 23.3 (3.8)  | < 0.001 |
| 8  | Word list: memory (range: 0 – 30)              | 16.6 (4.4)  | 17.8 (3.7)  | 16.2 (4.0)  | 14.4 (4.2)  | < 0.001 | 18.1 (4.1)  | 16.6 (4.5)  | 14.6 (4.7)  | < 0.001 |
| 9  | Word list: recall (range: 0 – 10)              | 5.5 (2.1)   | 6.1 (1.9)   | 5.3 (2.0)   | 4.6 (2.1)   | < 0.001 | 6.1 (2.0)   | 5.3 (2.1)   | 4.5 (2.2)   | < 0.001 |
| 10 | Word list: recognition (range: 0 – 10)         | 8.5 (1.9)   | 8.9 (1.4)   | 8.5 (1.9)   | 8.2 (2.2)   | < 0.001 | 8.9 (1.6)   | 8.4 (1.9)   | 8 (2.4)     | < 0.001 |
| 11 | FAB (range: 0 – 18)                            | 13.4 (3.1)  | 14.6 (2.4)  | 14 (2.7)    | 13.3 (3.2)  | < 0.001 | 13.4 (2.9)  | 12.7 (3.1)  | 11.4 (3.3)  | < 0.001 |
| 12 | Nutritional status, <i>n</i> (%)               |             |             |             |             |         |             |             |             |         |
| 13 | Normal                                         | 2519 (83.8) | 450 (86.5)  | 457 (82.9)  | 297 (82.7)  |         | 576 (86.2)  | 464 (81.3)  | 275 (81.4)  |         |
| 14 | At risk of malnutrition                        | 457 (15.2)  | 68 (13.1)   | 88 (16.0)   | 53 (14.8)   | 0.037   | 89 (13.3)   | 103 (18.0)  | 56 (16.6)   | 0.013   |
| 15 | Malnutrition, yes, <i>n</i> (%)                | 31 (1.0)    | 2 (0.4)     | 6 (1.1)     | 9 (2.5)     |         | 3 (0.4)     | 4 (0.7)     | 7 (2.1)     |         |
| 16 | Social function, <i>n</i> (%)                  |             |             |             |             |         |             |             |             |         |
| 17 | Social network type                            |             |             |             |             |         |             |             |             |         |
| 18 | Contact with others more than once a week      | 2502 (83.0) | 420 (80.6)  | 449 (81.3)  | 287 (79.9)  | 0.870   | 574 (85.9)  | 486 (84.7)  | 286 (84.1)  | 0.704   |
| 19 | Attending religious gatherings at least once a |             |             |             |             |         |             |             |             |         |
| 20 | month regularly                                | 1272 (42.2) | 161 (30.9)  | 177 (32.1)  | 126 (35.1)  | 0.513   | 355 (53.1)  | 289 (50.3)  | 164 (48.2)  | 0.521   |
| 21 | Social capital                                 |             |             |             |             |         |             |             |             |         |
| 22 | Participating in more than two social          | 1632 (54.1) | 273 (52.4)  | 265 (48.0)  | 172 (47.9)  | 0.272   | 423 (63.3)  | 327 (57.0)  | 172 (50.6)  | < 0.001 |
| 23 | gatherings                                     |             |             |             |             |         |             |             |             |         |
| 24 | Social support                                 |             |             |             |             |         |             |             |             |         |
| 25 | Receiving instrumental support                 | 2212 (73.4) | 380 (72.9)  | 408 (73.9)  | 261 (72.7)  | 0.903   | 496 (74.3)  | 424 (73.9)  | 243 (71.5)  | 0.621   |
| 26 | Receiving informational support                | 2345 (77.8) | 392 (75.2)  | 424 (76.8)  | 273 (76)    | 0.834   | 542 (81.1)  | 452 (78.7)  | 262 (77.1)  | 0.283   |
| 27 | Receiving appraisal support                    | 2351 (78.0) | 392 (75.2)  | 433 (78.4)  | 271 (75.5)  | 0.402   | 540 (80.8)  | 455 (79.3)  | 260 (76.5)  | 0.269   |
| 28 | Medical conditions, <i>n</i> (%)               |             |             |             |             |         |             |             |             |         |
| 29 | Hypertension                                   | 1746 (57.9) | 263 (50.5)  | 302 (54.7)  | 211 (58.8)  | 0.108   | 369 (55.2)  | 354 (61.7)  | 247 (72.6)  | < 0.001 |
| 30 | Diabetes mellitus                              | 663 (22)    | 117 (22.5)  | 136 (24.6)  | 86 (24.0)   | 0.722   | 126 (18.9)  | 116 (20.2)  | 82 (24.1)   | 0.136   |
| 31 | Arthritis                                      | 761 (25.2)  | 62 (11.9)   | 77 (13.9)   | 56 (15.6)   | 0.439   | 205 (30.7)  | 220 (38.3)  | 141 (41.5)  | 0.007   |
| 32 | Osteoporosis                                   | 483 (16.0)  | 8 (1.5)     | 22 (4.0)    | 19 (5.3)    | 0.004   | 158 (23.7)  | 172 (30.0)  | 104 (30.6)  | 0.001   |
| 33 | Depression                                     | 87 (2.9)    | 5 (1.0)     | 15 (2.7)    | 8 (2.2)     | 0.112   | 21 (3.1)    | 26 (4.5)    | 12 (3.5)    | 0.427   |
| 34 | Heart disease                                  | 251 (8.5)   | 53 (10.2)   | 61 (11.2)   | 38 (10.8)   | 0.874   | 31 (4.8)    | 36 (6.4)    | 32 (9.8)    | 0.010   |
| 35 | Polypharmacy                                   | 891 (32.8)  | 174 (28.2)  | 148 (37.6)  | 86 (44.4)   | < 0.001 | 231 (24.2)  | 175 (30.0)  | 77 (42.0)   | < 0.001 |

Abbreviations: BMI = body mass index; ADL = Activities of Daily Living; IADL = Instrumental Activities of Daily Living; SPPB = Short Physical Performance Battery; GDS = Geriatric Depression Scale; EQ-5D = EuroQol five-dimension scale; MMSE = Mini-Mental State Examination; FAB = Frontal Assessment Battery. Nutritional status was rated using the Mini-Nutritional Assessment screening score (12 – 14 points, normal; 8 – 11 points, at risk of malnutrition; 0 – 7 points, malnutrition); polypharmacy indicates the use of five or more prescribed drugs.

1  
2  
3  
4 There were no statistically significant differences between sexes except for the following  
5  
6 variables: marriage status, whether the subject received instrumental support, whether the subject  
7  
8 received a basic living subsidy, whether the subject received appraisal support, self-rated health,  
9  
10 performance in word recall, performance in word recognition, weight loss status, low activity  
11  
12 status, grip strength, and gait speed.  
13  
14  
15

16  
17 The prospective cohort design of the KFACS included data collection every 2 years. The  
18  
19 first wave of baseline data collection started in 2016 – 2017, and the follow-up (2018 – 2019) has  
20  
21 been currently finished. Follow-up surveys were conducted on a 2-year basis with 4 months of  
22  
23 allowance limitations. The follow-up rate in 2018 was 92.5%, with 88.4% visiting the clinical  
24  
25 sites, 11% involving telephone interviews, and approximately 0.5% involving home visits. The  
26  
27 follow-up rate was 93.9% if we included findings such as entering nursing homes (four  
28  
29 participants) or death (18 participants). The mean follow-up time range was  $682.6 \pm 34.4$  days.  
30  
31 Moreover, the follow-up rate in 2019 was 94.8%, with 91.1% visiting the clinical site, 8.5%  
32  
33 participating telephone interview, and 0.2% comprising home visits. If we include findings on  
34  
35 nursing home (one participant) or death (19 participants), the follow-up rate would be 96.2% in  
36  
37 2019. The mean follow-up time range was  $705.1 \pm 38.0$  days. Strategies promoting recruitment  
38  
39 and retainment included enlisting caregiver assistance, providing transportation for center visit,  
40  
41 explaining key test results, informing participants of identified health issues, maintaining regular  
42  
43 communication (phone calls, greeting cards for holidays, and birthday), and involving proxy  
44  
45 respondents' answer.  
46  
47  
48  
49

#### 50 51 *Field work methods* 52 53

54 All participants visited their corresponding study centers to conduct face-to-face interviews,  
55  
56  
57

health examinations, and laboratory tests for the baseline survey. At follow-up, participants primarily visited their center, but we also conducted home visits, telephone interviews, and proxy interviews (in this order) if visiting the center was not possible.

### *Data collection and variables*

**Table 2.** Summary of variables collected from the Korean Frailty and Aging Cohort Study (KFACS) at baseline (2016-2017) and the first follow-up period (2019-2020)

| Variable                                             | Baseline | Follow-up | Proxy interviews |
|------------------------------------------------------|----------|-----------|------------------|
| <i>Demographics</i>                                  |          |           |                  |
| Age, sex, education                                  | ✓        | ✓         |                  |
| Marital status, family structure                     | ✓        | ✓         | ✓                |
| Work/employment                                      | ✓        | ✓         |                  |
| Household income                                     | ✓        | ✓         | ✓                |
| Living environment (rural, suburban, urban)          | ✓        | ✓         |                  |
| <i>Health behavior</i>                               |          |           |                  |
| Smoking, alcohol drinking                            | ✓        | ✓         | ✓                |
| Sleep, physical activity (IPAQ)                      | ✓        | ✓         | ✓                |
| IPAQ environmental module                            | ✓        |           |                  |
| Oral hygiene, dental checkup                         | ✓        | ✓         |                  |
| Health checkup                                       | ✓        | ✓         |                  |
| Nutritional risk (MNA)                               | ✓        | ✓         | ✓                |
| Eating behavior                                      | ✓        | ✓         |                  |
| Food security                                        | ✓        |           |                  |
| Short Nutritional Assessment Questionnaire (SNAQ)    |          | ✓         |                  |
| <i>Health Status</i>                                 |          |           |                  |
| Self-rated health (SF-12), comorbidity, polypharmacy | ✓        | ✓         |                  |
| Constipation                                         |          | ✓         |                  |
| Quality of life (EQ-5D)                              | ✓        | ✓         |                  |
| EuroQol Visual Analogue Scale (EQ-VAS)               | ✓        | ✓         |                  |
| Depressive symptoms (GDS-SF)                         | ✓        | ✓         |                  |
| K-ADL                                                | ✓        | ✓         |                  |
| K-IADL                                               | ✓        | ✓         | ✓                |
| Physical resilience                                  |          | ✓         |                  |
| Experience of falls, recent injury, fear of falling  | ✓        | ✓         | ✓                |
| Activities-specific Balance, Confidence scale (ABC)  | ✓        | ✓         |                  |
| Oral health: mastication, pronunciation difficulties | ✓        | ✓         |                  |
| Women's health                                       | ✓        |           |                  |
| <i>Healthcare</i>                                    |          |           |                  |
| Outpatient visits, hospitalization, unmet needs      | ✓        | ✓         |                  |
| Healthcare costs, long-term care services            | ✓        | ✓         |                  |

1  
2  
3  
4  
5  
6  
7  
8  
9  
10  
11  
12  
13  
14  
15  
16  
17  
18  
19  
20  
21  
22  
23  
24  
25  
26  
27  
28  
29  
30  
31  
32  
33  
34  
35  
36  
37  
38  
39  
40  
41  
42  
43  
44  
45  
46  
47  
48  
49  
50  
51  
52  
53  
54  
55  
56  
57  
58  
59  
60

|                                                                                                   |   |   |   |
|---------------------------------------------------------------------------------------------------|---|---|---|
| Health literacy                                                                                   | ✓ | ✓ |   |
| <i>Social function</i>                                                                            |   |   |   |
| Social network: PANT                                                                              | ✓ | ✓ |   |
| Social capital: Participation in social activities                                                | ✓ | ✓ | ✓ |
| Social support: ENRICHD                                                                           | ✓ | ✓ |   |
| <i>Cognitive function (CERAD-K, FAB)</i>                                                          |   |   |   |
| Global cognition: MMSE                                                                            | ✓ | ✓ |   |
| Executive function: FAB                                                                           | ✓ | ✓ |   |
| Processing speed: Trail Making Test A                                                             | ✓ | ✓ |   |
| Memory: word list memory, recall, recognition                                                     | ✓ | ✓ |   |
| Attention: digit span forward/digit span backward                                                 | ✓ | ✓ |   |
| Korean version of the Alzheimer's disease survey                                                  |   |   | ✓ |
| <i>Anthropometry</i>                                                                              |   |   |   |
| Body weight, height                                                                               | ✓ | ✓ | ✓ |
| Body weight last year                                                                             | ✓ | ✓ | ✓ |
| Head circumference, waist circumference                                                           | ✓ | ✓ |   |
| Leg length                                                                                        | ✓ | ✓ |   |
| Upper arm circumference, calf circumference                                                       | ✓ | ✓ |   |
| <i>Physical function</i>                                                                          |   |   |   |
| Hand-grip strength                                                                                | ✓ | ✓ |   |
| 4-m usual gait speed                                                                              | ✓ | ✓ |   |
| SPPB – item 3: standing balance, item 5: chair-stand time, usual gait speed, timed up-and-go test | ✓ | ✓ |   |
| <i>Health Assessments</i>                                                                         |   |   |   |
| Vital signs: blood pressure, heart rate                                                           | ✓ | ✓ |   |
| Visual acuity: Snellen chart (corrected vision)                                                   | ✓ | ✓ |   |
| Hearing: pure tone audiometry (500, 1000, 2000, 3000, and 4000 Hz)                                | ✓ | ✓ |   |
| Electrocardiogram                                                                                 | ✓ | ✓ |   |
| Chest X-ray                                                                                       | ✓ | ✓ |   |
| <i>Body composition</i>                                                                           |   |   |   |
| Dual Energy X-ray Absorptiometry (DEXA): KFCAS at eight medical centers (2016 – 2017)             | ✓ | ✓ |   |
| Ultrasound: muscle quality (Kyung Hee University only)                                            | ✓ | ✓ |   |
| Bioelectric Impedance Analysis (BIA): KFCAS at two medical centers                                | ✓ | ✓ |   |
| Joint replacement (identifiable from DEXA images)                                                 |   | ✓ |   |
| <i>Panoramic radiography</i>                                                                      |   |   |   |
| Periodontitis, upper and lower jaw bones (bone mineral density)                                   | ✓ | ✓ |   |
| Supernumerary, missing, and impacted teeth, etc.                                                  | ✓ | ✓ |   |
| <i>Frailty &amp; Sarcopenia Assessment</i>                                                        |   |   |   |

|                                                                                                                                                                 |   |   |   |
|-----------------------------------------------------------------------------------------------------------------------------------------------------------------|---|---|---|
| CHS (Fried phenotype): unintentional weight loss, hand grip strength, self-reported exhaustion, physical activity, gait speed                                   | ✓ | ✓ |   |
| KLoSHA frailty index: SPPB, K-IADL, K-ADL, MMSE, albumin                                                                                                        | ✓ | ✓ |   |
| FRAIL questionnaire: fatigue, resistance, ambulation, illness, loss of weight                                                                                   | ✓ | ✓ | ✓ |
| Korean Frailty Index: eight items (hospitalization, self-rated health, polypharmacy, weight loss, depressed mood, incontinence, TUG, hearing/vision impairment) | ✓ | ✓ |   |
| Frailty scale: weakness, exhaustion, isolation                                                                                                                  | ✓ | ✓ |   |
| SOF index: chair-stand, energy (GDS), loss of weight                                                                                                            | ✓ | ✓ |   |
| SARC-F: five items (strength, assistance with walking, rising from a chair, climbing stairs, falls)                                                             | ✓ | ✓ |   |

Abbreviations: IPAQ = International Physical Activity Questionnaire; MNA = Mini-Nutritional Assessment; K-ADL = Korean Activities of Daily Living; K-IADL = Korean Instrumental Activities of Daily Living; SF-12 = 12-item Short Form Survey; EQ-VAS = EuroQol Visual Analogue Scale; ABC = Activities-specific Balance, Confidence scale; PANT = Practitioner Assessment of Network Type; ENRICHED = Enhancing Recovery in Coronary Artery Disease; MMSE = Mini-Mental State Examination; FAB = Frontal Assessment Battery; SPPB = Short Physical Performance Battery; CHS = Cardiovascular Health Study; KLoSHA = Korean Longitudinal Study on Health and Aging; TUG = timed up-and-go; SOF = Study of Osteoporotic Fracture; GDS = Geriatric Depression Scale. Health literacy was assessed based on the capacity to obtain, process, understand, and use health information.

The variables of the KFACS questionnaires are listed in Table 2 and consisted of demographics, including socioeconomic status, living environment, lifestyle and health-related behaviors, the International Physical Activity Questionnaire (IPAQ) [15], the IPAQ environmental module (IPAQ-E) [16], dental checkup status, and nutritional status using the Korean version of the Mini-Nutritional Assessment (MNA) [17]. Health status was determined according to self-rated health conditions (SF-12) [18]. We used a pre-defined list of chronic health conditions, which are based on comorbidities according to Charlson's classification to collect self-reported and physician-diagnosed chronic diseases [19], medications, quality of life (EQ-5D) [20], and EuroQol Visual Analogue Scale (EQ-VAS) [21]. A 15-item Korean version

1  
2  
3  
4 of the Short Form Geriatric Depression Scale (SGDS-K) [22], activities of daily living (ADL),  
5  
6 instrumental activities of daily living (IADL) [23], falls and fear of falling, Activities-specific  
7  
8 Balance, Confidence scale (ABC) [24], oral health, and women's health of the participants were  
9  
10 scored, and the number of outpatient services, hospitalization rate, number of long-term care  
11  
12 services, and health literacy were determined to measure health status. Social assessment  
13  
14 included Practitioner Assessment of Network Type (PANT) [25], social participation and  
15  
16 activities, and the Enhancing Recovery in Coronary Artery Disease (ENRICH) Social Support  
17  
18 Instrument [26-27]. For cognitive function, assessments were made using the Mini-Mental State  
19  
20 Examination (MMSE); Trail Making Test A; word list memory, recall, and recognition; digit  
21  
22 span [28] in the Consortium to Establish a Registry for Alzheimer's disease (CERAD) [29]; and  
23  
24 Frontal Assessment Battery (FAB) [30]. We included anthropometric measurements of body  
25  
26 weight, height, head circumference, waist circumference, leg length, and upper arm  
27  
28 circumference. Physical function was assessed based on grip strength, gait speed, the Short  
29  
30 Physical Performance Battery (SPPB), and timed up-and-go test. Health assessments, such as  
31  
32 those for blood pressure, heart rate, visual acuity, and hearing (pure tone audiometry), as well as  
33  
34 electrocardiograms and chest X-rays were carried out. To determine body composition, dual  
35  
36 energy X-ray absorptiometry (DEXA) was performed at eight centers and bioelectrical  
37  
38 impedance analysis (BIA) was performed at two centers. Panoramic radiography was carried out  
39  
40 to assess dental status. Blood samples after an 8-h fast were taken at around 08:00 to ensure the  
41  
42 reliability of hormone tests (Table 3). All blood and urine samples from the participants at 10  
43  
44 centers were brought to a commercial laboratory and used for the tests. An extra 10 ml of blood  
45  
46 was collected from each participant and sent to Kyung Hee University Medical Center for  
47  
48 storage in deep freezers.  
49  
50  
51  
52  
53  
54  
55  
56



**Table 3.** List of laboratory test variables collected during the Korean Frailty and Aging Cohort Study (KFACS) baseline survey (2016 – 2017)

| 2016 – 2017                                                                                                                                                                                                                                                                                                                                                                                                                                                                                                                                                                                                                                                                                                                                                                                                                                                                                           |
|-------------------------------------------------------------------------------------------------------------------------------------------------------------------------------------------------------------------------------------------------------------------------------------------------------------------------------------------------------------------------------------------------------------------------------------------------------------------------------------------------------------------------------------------------------------------------------------------------------------------------------------------------------------------------------------------------------------------------------------------------------------------------------------------------------------------------------------------------------------------------------------------------------|
| <p>Laboratory Tests (Taken at 08:00 after 8 h of fasting)</p> <ul style="list-style-type: none"> <li>• Hematology: CBC (WBC, RBC, Hb, HCT, MCV, MCHC, platelet)</li> <li>• Biochemistry: AST, ALT, GGT, total protein, albumin, total bilirubin, alkaline phosphatase, creatine kinase, BUN, creatinine, sodium, potassium, chloride, cystatin C, HBs Ag</li> <li>• Metabolic parameters: glucose (FBS), calcium, phosphorus (Pi), magnesium, HbA1c, total cholesterol, LDL-C, HDL-C, triglyceride, 25 (OH) vitamin D, vitamin B12</li> <li>• Hormone and tumor markers: free T4, TSH, insulin, cortisol (S), free testosterone, <b>DHEA, IGF-1</b></li> <li>• Inflammation markers: hs-CRP, <b>GDF-15</b></li> <li>• Genetic and muscle: <b>myostatin</b>, AMPK (phenotype)</li> <li>• Urine test: urine 10 (stick), urine microscopic</li> </ul> <p>※ Variables in bold text were added in 2017</p> |

Abbreviations: BUN = blood urea nitrogen; AST = aspartate aminotransferase test; ALT = alanine aminotransferase test; GGT = gamma-glutamyl transferase; HDL = high-density lipoprotein; LDL = low-density lipoprotein; Hb A1c = hemoglobin A1c; WBC = white blood cell; RBC = red blood cell; Hb = hemoglobin, HCT = hematocrit test; MCV = mean corpuscular volume; MCH = mean corpuscular hemoglobin; MCHC = mean corpuscular hemoglobin concentration; HBs Ag = hepatitis B virus surface antigen; TSH = thyroid-stimulating hormone; Hs-CRP = high-sensitivity C-reactive protein; IGF-1 = insulin-like growth factor 1; DHEA = dehydroepiandrosterone; GDF-15 = growth/differentiation factor 15.

### *Frailty assessment*

To define physical frailty, the KFACS used a modified version of the Fried Frailty Phenotype (FFP) consisting of five components of frailty: unintended weight loss, weakness, self-reported exhaustion, slowness, and low physical activity [31].

- Unintentional weight loss: defined as a “yes” response to the question: “In the last year, have you lost more than 4.5 kg unintentionally?”
- Weakness: defined as the lower 20th percentile of grip strength (maximal grip strength



in kg after measuring twice for each hand using a hand grip dynamometer [T.K.K.5401; Takei Scientific Instruments Co, Ltd., Tokyo, Japan]) stratified by sex

and

| Men                              | Women                            | BMI |
|----------------------------------|----------------------------------|-----|
| BMI $\leq 22 \dots \leq 25.0$ kg | BMI $\leq 23 \dots \leq 16.8$ kg |     |
| BMI 22.1–24... $\leq 27.0$ kg    | BMI 23.1–25... $\leq 17.7$ kg    |     |
| BMI 24.1–26... $\leq 27.8$ kg    | BMI 25.1–27... $\leq 17.8$ kg    |     |
| BMI $> 26 \dots \leq 28.5$ kg    | BMI $> 27 \dots \leq 17.7$ kg    |     |

quartiles based on the KFACS baseline survey.

- Self-reported exhaustion: defined as a “yes” response to either of the following statements from the Center for Epidemiological Studies-Depression scale on 3 or more days per week: “I felt that everything I did was an effort” and “I could not get going.”
- Slowness: Walking speed over 4 m was measured using an automatic timer (Gaitspeedometer; Dynamicphysiology, Daejeon, Korea), with acceleration and deceleration phases of 1.5 m. The mean values were selected after measuring twice. The lowest 20% of gait speed stratified by sex and height based on KFACS data was suggested as a cut-off.

| Men                                     | Women                                   |
|-----------------------------------------|-----------------------------------------|
| Height $\leq 165$ cm... $\leq 0.93$ m/s | Height $\leq 152$ cm... $\leq 0.85$ m/s |
| Height $> 165$ cm... $\leq 0.98$ m/s    | Height $> 152$ cm... $\leq 0.93$ m/s    |

- Low physical activity: energy expenditure estimates (kcal/week) were calculated using the IPAQ and metabolic equivalent scores were derived from vigorous, moderate, and mild activities in the questionnaire. Low physical activity level was defined as  $< 494.65$  kcal for men and  $< 283.50$  kcal for women, corresponding to the lowest 20% of

1  
2  
3  
4 the total energy consumed in a population-based Korean survey of older adults from  
5  
6 among the general population [4].  
7  
8

9  
10 Total frailty scores (range: 0–5) were calculated by assigning a score of 1 to positive responses  
11  
12 on each of the above five components. Participants with a score of 0 were classified as “robust”,  
13  
14 a score of 1–2 as “prefrail”, and a score of 3–5 as “frail”.  
15

### 16 17 *Sub-cohorts* 18

19  
20 The KFACS is unique because it is a cohort study of community-dwelling older adults,  
21  
22 and it includes two sub-cohort studies: a survey of social frailty and a nutrition survey.  
23  
24

25  
26 The social frailty survey is a bimonthly telephone survey of a subgroup within the  
27  
28 KFACS cohort who participated in the second round of the 2017 KFACS baseline survey. From  
29  
30 September 2017 to February 2019, 582 older adults provided additional informed consent to  
31  
32 participate in the bimonthly telephone interviews. Among the 582 participants, 433 completed  
33  
34 the seventh survey (74.4% follow-up). The variables in this survey included: health-related  
35  
36 events (i.e., restricted activity), healthcare utilization (i.e., hospitalization, emergency room  
37  
38 visits, and medical expenses), disability (i.e., physical functioning and IADL activity), and frailty  
39  
40 (Tilburg Frailty Indicator), and social relationships (social network size and social activity  
41  
42 participation). Through the KFACS social sub-cohort, we expect to identify social factors that  
43  
44 determine and contribute to the physical frailty of older adults, and also to help more accurately  
45  
46 define social frailty.  
47  
48  
49

50  
51 To establish the nutritional sub-cohort, 1002 participants who gave informed consent  
52  
53 were selected from among the first round KFACS participants according to sampling criteria (i.e.  
54  
55 the ratios of age and sex). The 24-h dietary recall method was used to assess dietary factors  
56  
57

1  
2  
3  
4 during home-visit personal interviews. Of the 1002 subjects from the first-round baseline (2016)  
5  
6 KFACS cohort who participated in 2016 – 2017, 522 participants completed the 2-year follow-  
7  
8 up survey conducted in 2018 – 2019. Numerous studies have reported the effects of proper  
9  
10 nutrition in older adults, which lowers the prevalence of frailty [32-33]. Including the nutrition  
11  
12 sub-cohort will enable us to develop protein intake guidelines and nutritional intervention  
13  
14 programs to prevent frailty, as one of the significant risk factors.  
15  
16

### 17 18 19 *Data quality assurance*

20  
21  
22 The study procedures were carried out by two clinical research investigators from each  
23  
24 of the 10 centers, for a total of 20 clinical investigators who carried the study procedures. The  
25  
26 research investigators had been trained at Kyung Hee University Medical Center by KFACS  
27  
28 staff members every year and had taken tests to ensure standardized quality. In addition, KFACS  
29  
30 staff members visit the centers annually and monitor the investigators' performance based on the  
31  
32 protocol, manual, and examination guidebook created by the KFACS group.  
33  
34

35  
36 All data obtained from the questionnaires were sent to Kyung Hee University Medical  
37  
38 Center and managed by one medical record administrator.  
39  
40

### 41 **Findings to date**

42  
43 In the baseline study (2016 – 2017) a total of 2907 out of 3014 individuals fulfilled all  
44  
45 five components of Fried's frailty phenotype. The results indicated that 7.8% of the participants  
46  
47 (n = 228) were frail, 47.0% (n = 1366) were pre-frail, and 45.2% (n = 1313) were robust (Table  
48  
49 4). The prevalence of frailty increased with age in both sexes; in the group aged 70 – 74 years,  
50  
51 1.8% of men and 3.7% of women were frail, whereas in the 80 – 84 years age group, 14.9% of  
52  
53 men and 16.7% of women were frail. Women tended to exhibit a higher prevalence of frailty  
54  
55  
56

1  
2  
3  
4 than men in all age groups (Table 4).  
5  
6

#### 7 *Publications and findings using KFACS data*

8

9 Among the social factors, the risk of frailty increased significantly when the frequency  
10 of contact with friends decreased [34]. Nutritional status (especially anorexia) was shown to  
11 increase the risk of frailty [35], the average daily intake of nutrients (adjusted for sex and age)  
12 was shown to decrease significantly with increasing severity of frailty, and frail subjects had  
13 significantly lower levels of protein, vitamin E, vitamin C, and calcium intake than robust  
14 subjects and subjects in the pre-frail stage [36]. Frailty was associated with long sleep latency in  
15 elderly male subjects and with sleeping for more than 8 h in elderly female subjects [37].  
16 Moreover, our previous study showed that moderate hearing loss was strongly associated with  
17 social frailty [38]. The prevalence of frailty was reported to increase with a daily sodium intake  
18 of > 3575 mg [39]. The self-administered health assessment tool, the EQ-VAS, was deemed  
19 appropriate as a frailty screening tool [40], and low calf circumference (< 32 cm) was shown to  
20 be strongly related to cognitive frailty in men [41].  
21  
22  
23  
24  
25  
26  
27  
28  
29  
30  
31  
32  
33  
34  
35

#### 36 *Brief analysis plans*

37

38 Utilizing longitudinal KFACS data, both cross-sectional and longitudinal relationships  
39 between demographic characteristics, health behaviors, health statuses, and physical frailty will  
40 be characterized in a specifically Korean sample. In addition to identifying the risk factors and  
41 predictors of frailty by examining cohorts of community-dwelling older Korean adults on the  
42 national scale, we will provide the basis for developing future evaluation guidelines and  
43 screening tools for the prevention and management of physical frailty.  
44  
45  
46  
47  
48  
49  
50  
51  
52  
53  
54  
55  
56  
57  
58  
59  
60

**Table 4.** Characteristics of participants of the KFACS baseline survey, 2016 – 2017 according to Fried’s frailty phenotype (n = 2907). Participants were sorted into three age groups (70 –74, 75 – 79, and 80 – 84 years).

| Variable                                                    | Total<br>(n=2,907) | Male<br>(n=1,383) | Female<br>(n=1,524) | Male             |                  |                  | <i>p</i> | Female           |                  |                  | <i>p</i> |
|-------------------------------------------------------------|--------------------|-------------------|---------------------|------------------|------------------|------------------|----------|------------------|------------------|------------------|----------|
|                                                             |                    |                   |                     | 70-74<br>(n=506) | 75-79<br>(n=529) | 80-84<br>(n=348) |          | 70-74<br>(n=649) | 75-79<br>(n=551) | 80-84<br>(n=324) |          |
| Frailty status according to Fried’s phenotype, <i>n</i> (%) |                    |                   |                     |                  |                  |                  |          |                  |                  |                  |          |
| Robust                                                      | 1313 (45.2)        | 695 (50.3)        | 618 (40.6)          | 308 (60.9)       | 278 (52.6)       | 109 (31.3)       | < 0.001  | 318 (49.0)       | 223 (40.5)       | 77 (23.8)        | < 0.001  |
| Pre-frail                                                   | 1366 (47.0)        | 590 (42.7)        | 776 (50.9)          | 189 (37.4)       | 214 (40.5)       | 187 (53.7)       |          | 307 (47.3)       | 276 (50.1)       | 193 (59.6)       |          |
| Frail                                                       | 228 (7.8)          | 98 (7.1)          | 130 (8.5)           | 9 (1.8)          | 37 (7.0)         | 52 (14.9)        |          | 24 (3.7)         | 52 (9.4)         | 54 (16.7)        |          |
| Frailty phenotype, <i>n</i> (%)                             |                    |                   |                     |                  |                  |                  |          |                  |                  |                  |          |
| Unintentional weight loss (> 4.5 kg)                        | 142 (4.9)          | 75 (5.4)          | 67 (4.4)            | 18 (3.6)         | 34 (6.4)         | 23 (6.6)         | 0.062    | 22 (3.4)         | 26 (4.7)         | 19 (5.9)         | 0.181    |
| Low grip strength                                           | 602 (20.7)         | 283 (20.5)        | 319 (20.9)          | 53 (10.5)        | 92 (17.4)        | 138 (39.7)       | < 0.001  | 85 (13.1)        | 119 (21.6)       | 115 (35.5)       | < 0.001  |
| Self-reported exhaustion                                    | 971 (33.4)         | 323 (23.4)        | 648 (42.5)          | 95 (18.8)        | 128 (24.2)       | 100 (28.7)       | 0.004    | 239 (36.8)       | 229 (41.6)       | 180 (55.6)       | < 0.001  |
| Slowness                                                    | 625 (21.5)         | 297 (21.5)        | 328 (21.5)          | 67 (13.2)        | 101 (19.1)       | 129 (37.1)       | < 0.001  | 75 (11.6)        | 124 (22.5)       | 129 (39.8)       | < 0.001  |
| Low physical activity                                       | 325 (11.2)         | 155 (11.2)        | 170 (11.2)          | 37 (7.3)         | 53 (10.0)        | 65 (18.7)        | < 0.001  | 46 (7.1)         | 59 (10.7)        | 65 (20.1)        | < 0.001  |

## Strengths and limitations

The main strengths of the KFACS are 1) the inclusion of a nationwide population of community-dwelling Korean older adults; 2) the attainment of over 90% of follow-up rate both in 2018 (92.4%) and in 2019 (94.8%) of the baseline data collected in 2016-2017; 3) a comprehensive scope of assessments, with the inclusion of physical examinations, health assessments, a neuropsychological battery for cognitive function, in-depth social function surveys, dental radiography, blood tests and banking, and most importantly, a diverse range of frailty and sarcopenia assessments; and most importantly all the data are available and open to all researchers; and 4) the inclusion of two sub-cohort studies i.e., a survey of social frailty involving bimonthly interviews and a nutrition survey involving home visits.

One weakness of the study is that the participants had to be ambulatory to visit the 10 centers in the baseline survey, and home-bound disabled or institutionalized persons could not participate. In addition, dementia patients with problems in communication were excluded. Second, the participants were not selected through probability sampling due to the strengthened data privacy laws that prevented researchers from acquiring the personal information of people living in the communities around the 10 centers. However, the distribution of sample characteristics (age, sex, education, place of residence) of KFACS participants was similar to the estimates of the older (70 – 84 years) population drawn from the national census.

## Collaboration

KFACS questionnaires, manuals, and guidelines used in the study are provided for the purposes of policy and academic research upon request. All published articles and news articles using the KFACS database, data provision manuals, and contact information are available at the KFACS website (<http://www.kfacs.kr>). The KFACS cohort database and blood samples are available to researchers, and the authors anticipate collaboration even with foreign researchers, although approval from the Kyung Hee University Hospital IRB is required to share the dataset or banked blood samples for all the researchers.

## Acknowledgements

We are grateful to the study participants and the staff of the Korean Frailty and Aging Cohort Study (KFACS) for their cooperation.

## Contributors

The study protocol was designed by CWW, YL and JK, DC, SK, COK, MKK, BC, KMC, ER, HCJ, SJS, JHL, YSP, SGL, BJK, HJK, JC, HG, and MK contributed on conceptual design and obtained data. CWW, SL, YL, and MK drafted the manuscript and SL and KJL analyzed the data. All authors participated in the revision of the manuscript, and approved the final version.

## Funding

This research was supported by a grant from the Korea Health Technology R & D Project through the Korean Health Industry Development Institute (KHIDI), which is funded by the Ministry of Health & Welfare, Republic of Korea (grant number: HI15C3153).

## Ethics Statement

The KFACS protocol was approved by the institutional review boards (IRBs) of the clinical research ethics committees of all 10 participating centers (Kyung Hee University, Seoul National University Hospital, Korea University Guro Hospital, Hallym University Medical Center – Chuncheon, Seoul National University Bundang Hospital, Ajou University Hospital, Gyeongsang National University Hospital, Chonnam National University Hospital, and Jeju National University Hospital), including the coordinating center, Kyung Hee University Hospital, Seoul, Korea (IRB number: 2015-12-103). All participants provided written informed consent. This report was exempted from approval by the IRB of the Clinical Research Ethics Committee of Kyung Hee University Hospital (IRB number: 2019-08-072).

## Competing interests

None declared.

## Data sharing statement

All published articles and news articles using the KFACS database, data provision manuals, and contact information are available at the KFACS website (<http://www.kfacs.kr>). The KFACS cohort database and blood samples are available to researchers, and the authors anticipate collaboration even with international researchers, although approval from the Kyung Hee University Hospital IRB is required to share the dataset or banked blood samples for all the researchers.

## Open Access

This is an Open Access article distributed in accordance with the Creative Commons Attribution Non Commercial (CC BY-NC 4.0) license, which permits others to distribute,



remix, adapt, build upon this work non-commercially, and license their derivative works on different terms, provided the original work is properly cited and the use is non-commercial.

See: <http://creativecommons.org/licenses/by-nc/4.0/>

## References

1. Korean Statistical Information Service. Korean Statistical Information Service (KOSIS) reports: 2018 the aged population panel. KOSIS, 2018.
2. Son J, Kim S, Won CW, et al. Physical frailty predicts medical expenses in community-dwelling, elderly patients: three-year prospective findings from living profiles of older people surveys in Korea. *European Geriatric Medicine*, 2015;6:412–6.
3. Ministry of Health and Welfare. *2017 The survey of living conditions and welfare needs of Korean older persons*. Seoul: Korean Institute for Health and Social Affairs, Ministry of Health and Welfare, 2008.
4. Ministry of Health and Welfare. *2008 Living profiles of older people survey in Korea*. Seoul: Korean Institute for Health and Social Affairs, Ministry of Health and Welfare, 2008.
5. Cesari M, Prince M, Thiyagarajan JA, et al. Frailty: an emerging public health priority. *Journal of the American Medical Directors Association*, 2016;17:188–92.
6. Won CW, Lee Y, Choi J, et al. Starting construction of Frailty Cohort for Elderly and Intervention Study. *Annals of Geriatric Medicine and Research*, 2016;20:114–117.
7. Morley J, Vellas B, Abellan van Kan G, et al. Frailty Consensus: A Call to Action. *Journal of the American Medical Directors Association*, 14(6), 392-397.
8. Park J, Lim S, Lim JY, et al. An overview of the Korean Longitudinal Study on Health and Aging. *Psychiatry Investigation*, 2007;4:84–95.
9. Lee EY, Kim HC, Rhee Y, et al. The Korean urban rural elderly cohort study: study design and protocol. *BMC Geriatrics*, 2014;14:33.
10. Jung HW, Jang IY, Lee YS, et al. Prevalence of frailty and aging-related health conditions in older Koreans in rural communities: a cross-sectional analysis of the Aging Study of Pyeongchang Rural Area. *Journal of Korean Medical Science*, 2016;31:345–52.
11. Chung K. Changes in the Living Profiles of Older Persons and Policy Issues. *Health and welfare policy forum*, 2014;216, 7-17.
12. Han G & Yang E. Evaluation of Dietary Habit and Nutritional Intake of Korean Elderly: Data from Korea National Health and Nutrition Examination Survey

- 2013~2015. *Journal of the East Asian Society of Dietary Life*, 2018; 28(4), 258-271.
13. Korean Statistical Information Service. Participation in Community Activities. Korean Statistical Information Service (KOSIS), 2015
  14. Kim T, Lee J, & Jung J. Elderly Poverty and Depression: Focusing on the Multidimensional Concept of Poverty. *Health and Social Welfare Review*, 2015; 35(3), 71-102.
  15. Oh JY, Yang YJ, Kim BS, et al. Validity and reliability of Korean version of International Physical Activity Questionnaire (IPAQ) short form. *Journal of the Korean Academy of Family Medicine*, 2007;28:532-541.
  16. Alexander A, Bergman P, Hagströmer M, et al. IPAQ environmental module; reliability testing. *Journal of Public Health*, 2016;14:76-80.
  17. Nestlé Nutrition Institute. *Mini Nutritional Assessment (MNA)*. Nestlé Nutrition Institute, 2009
  18. Kim SH, Jo MW, Ahn J, et al. Assessment of psychometric properties of the Korean SF-12 v2 in the general population. *BMC Public Health*, 2014;14:1086.
  19. Charlson ME, Pompei P, Ales KL, et al. A new method of classifying prognostic comorbidity in longitudinal studies: Development and validation, *Journal of Chronic Diseases*, 1987; 40 (5) 373-383
  20. Kim MH, Cho YS, Uhm WS, et al. Cross-cultural adaptation and validation of the Korean version of the EQ-5D in patients with rheumatic diseases. *Quality of Life Research*, 2005;14:1401-6.
  21. The EuroQol Group. EuroQol - a new facility for the measurement of health-related quality of life. *Health Policy*, 1990;16:199-208.
  22. Bae JN, Cho MJ. Development of the Korean version of the Geriatric Depression Scale and its short form among elderly psychiatric patients *Journal of Psychosomatic Research*, 2004;57:297-305.
  23. Won CW, Yang KY, Rho YG, et al. The development of Korean Activities of Daily Living (K-ADL) and Korean Instrumental Activities of Daily Living (K-IADL) Scale. *Journal of the Korean Geriatrics Society*, 2002;6:107-20.
  24. Jang SN, Cho SI, Ou SW, et al. The validity and reliability of Korean Fall Efficacy Scale (FES) and Activities-specific Balance Confidence Scale (ABC). *Journal of the Korean Geriatrics Society*, 2003;7:255-68.
  25. Wenger GC, Tucker I. Using network variation in practice: identification of support network type. *Health and Social Care in the Community*, 2002;10:28-35.
  26. Mitchell PH, Powell L, Blumenthal J, et al. A short social support measure for patients recovering from myocardial infarction. *Journal of Cardiopulmonary Rehabilitation*, 2003;23:398-403.

- 1
  - 2
  - 3
  - 4
  - 5
  - 6
  - 7
  - 8
  - 9
  - 10
  - 11
  - 12
  - 13
  - 14
  - 15
  - 16
  - 17
  - 18
  - 19
  - 20
  - 21
  - 22
  - 23
  - 24
  - 25
  - 26
  - 27
  - 28
  - 29
  - 30
  - 31
  - 32
  - 33
  - 34
  - 35
  - 36
  - 37
  - 38
  - 39
  - 40
  - 41
  - 42
  - 43
  - 44
  - 45
  - 46
  - 47
  - 48
  - 49
  - 50
  - 51
  - 52
  - 53
  - 54
  - 55
  - 56
  - 57
  - 58
  - 59
  - 60
27. Shin N, Kang Y. The relationships among health locus of control and resilience, social support and health promoting behavior in patients with newly diagnosed coronary artery diseases. *Korean Journal of Adult Nursing*, 2015;27:294–303.
28. Ahn HJ, Chin J, Park A, et al. Seoul Neuropsychological Screening Battery-Dementia version (SNSB-D): A useful tool for assessing and monitoring cognitive impairments in dementia patients. *Journal of Korean Medical Science*, 2010;25:1071.
29. Lee DY, Lee KU, Lee JH, et al. A normative study of the CERAD neuropsychological assessment battery in the Korean elderly. *Journal of the International Neuropsychological Society*, 2004;10:72–81.
30. Kim TH, Huh Y, Choe JY, et al. Korean Version of Frontal Assessment Battery: psychometric properties and normative data. *Dementia and Geriatric Cognitive Disorders*, 2010;29:363–70.
31. Fried LP, Tangen CM, Walston J, et al. Frailty in older adults: evidence for a phenotype. *The Journals of Gerontology Series A: Biological Sciences and Medical Sciences*, 2001;56:M146–56.
32. Cameron I, Fairhall N, Langron C, et al. A multifactorial interdisciplinary intervention reduces frailty in older people: randomized trial. *BMC Med*. 2013;11:65.
33. Ng TP, Feng L, Zin Nyunt MS, et al. Nutritional, physical, cognitive and combination interventions and frailty reversal among older adults: a randomized controlled trial. *Am J Med* 2015;128:1225-36.
34. Chon D, Lee Y, Kim J, et al. The association between frequency of social contact and frailty in older people: Korean Frailty and Aging Cohort Study (KFACS). *Journal of Korean Medical Science*, 2018;33:e332.
35. Kim J, Lee Y, Won CW, et al. Nutritional status and frailty in community-dwelling older korean adults: the Korean Frailty and Aging Cohort Study. *The Journal of Nutrition, Health & Aging*, 2018;22:774–8.
36. Park Y, Lee Y. Association between protein intake and frailty in the Korean elderly of KFACS. *Annals of Nutrition & Metabolism*, 2017;71:616.
37. Kang I, Kim S, Kim BS, et al. Sleep latency in men and sleep duration in women can be frailty markers in community-dwelling older adults: the Korean Frailty and Aging Cohort Study (KFACS). *The Journal of Nutrition, Health & Aging*, 2018;23:63–7.
38. Yoo M, Kim S, Kim B, et al. Moderate hearing loss is related with social frailty in community-dwelling older adults: the Korean Frailty and Aging Cohort Study (KFACS). *Archives of Gerontology and Geriatrics*, 2019;83:126–30.
39. Kim S, Kim M, Min J, et al. How much intake of sodium is good for frailty? The Korean Frailty and Aging Cohort Study (KFACS). *The Journal of Nutrition, Health & Aging*, 2019; 23:503–8.

- 1  
2  
3  
4  
5  
6  
7  
8  
9  
10  
11  
12  
13  
14  
15  
16  
17  
18  
19  
20  
21  
22  
23  
24  
25  
26  
27  
28  
29  
30  
31  
32  
33  
34  
35  
36  
37  
38  
39  
40  
41  
42  
43  
44  
45  
46  
47  
48  
49  
50  
51  
52  
53  
54  
55  
56  
57  
58  
59  
60
40. Kim S, Won CW, Kim BS, et al. EuroQol Visual Analogue Scale (EQ-VAS) as a predicting tool for frailty in older Korean adults: the Korean Frailty and Aging Cohort Study (KFACS). *The Journal of Nutrition, Health & Aging*, 2018;22:1275–80.
41. Kim M, Jeong M, Yoo J, et al. Calf circumference as a screening tool for cognitive frailty in community-dwelling older adults: the Korean Frailty and Aging Cohort Study (KFACS). *Journal of Clinical Medicine*, 2018;7:332

For peer review only

1  
2  
3  
4  
5  
6  
7  
8  
9  
10  
11  
12  
13  
14  
15  
16  
17  
18  
19  
20  
21  
22  
23  
24  
25  
26  
27  
28  
29  
30  
31  
32  
33  
34  
35  
36  
37  
38  
39  
40  
41

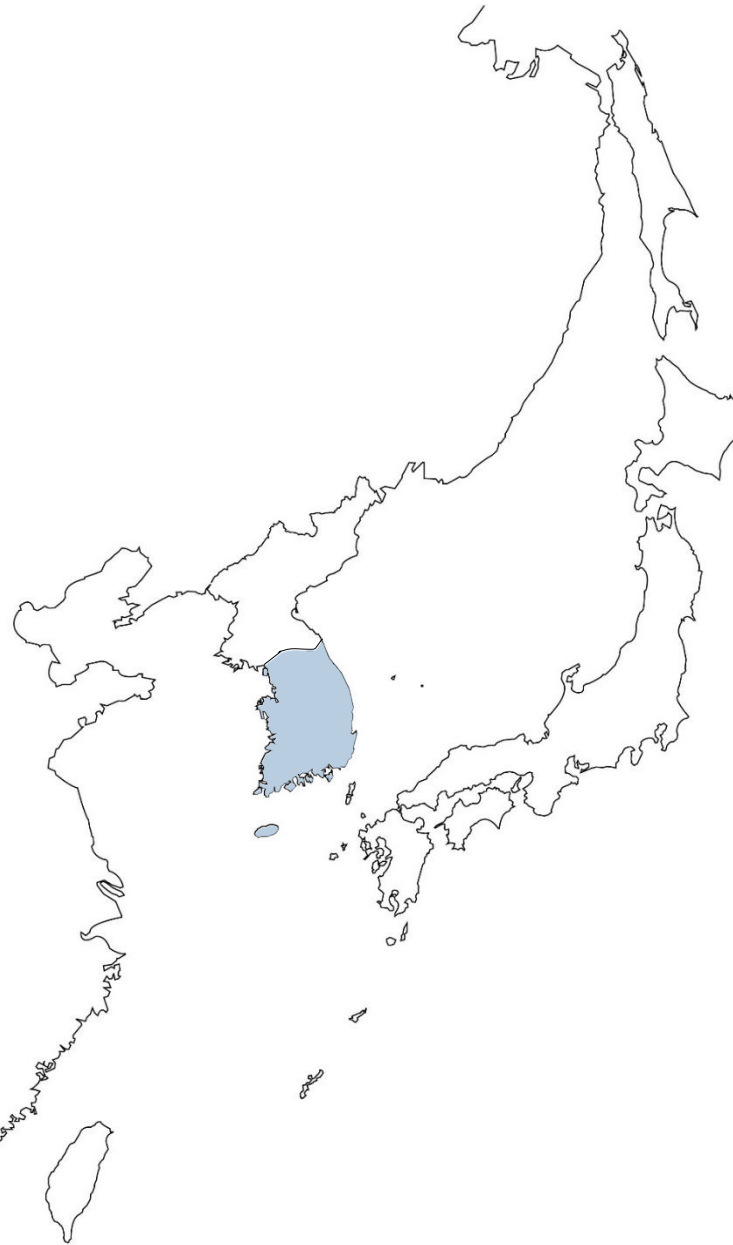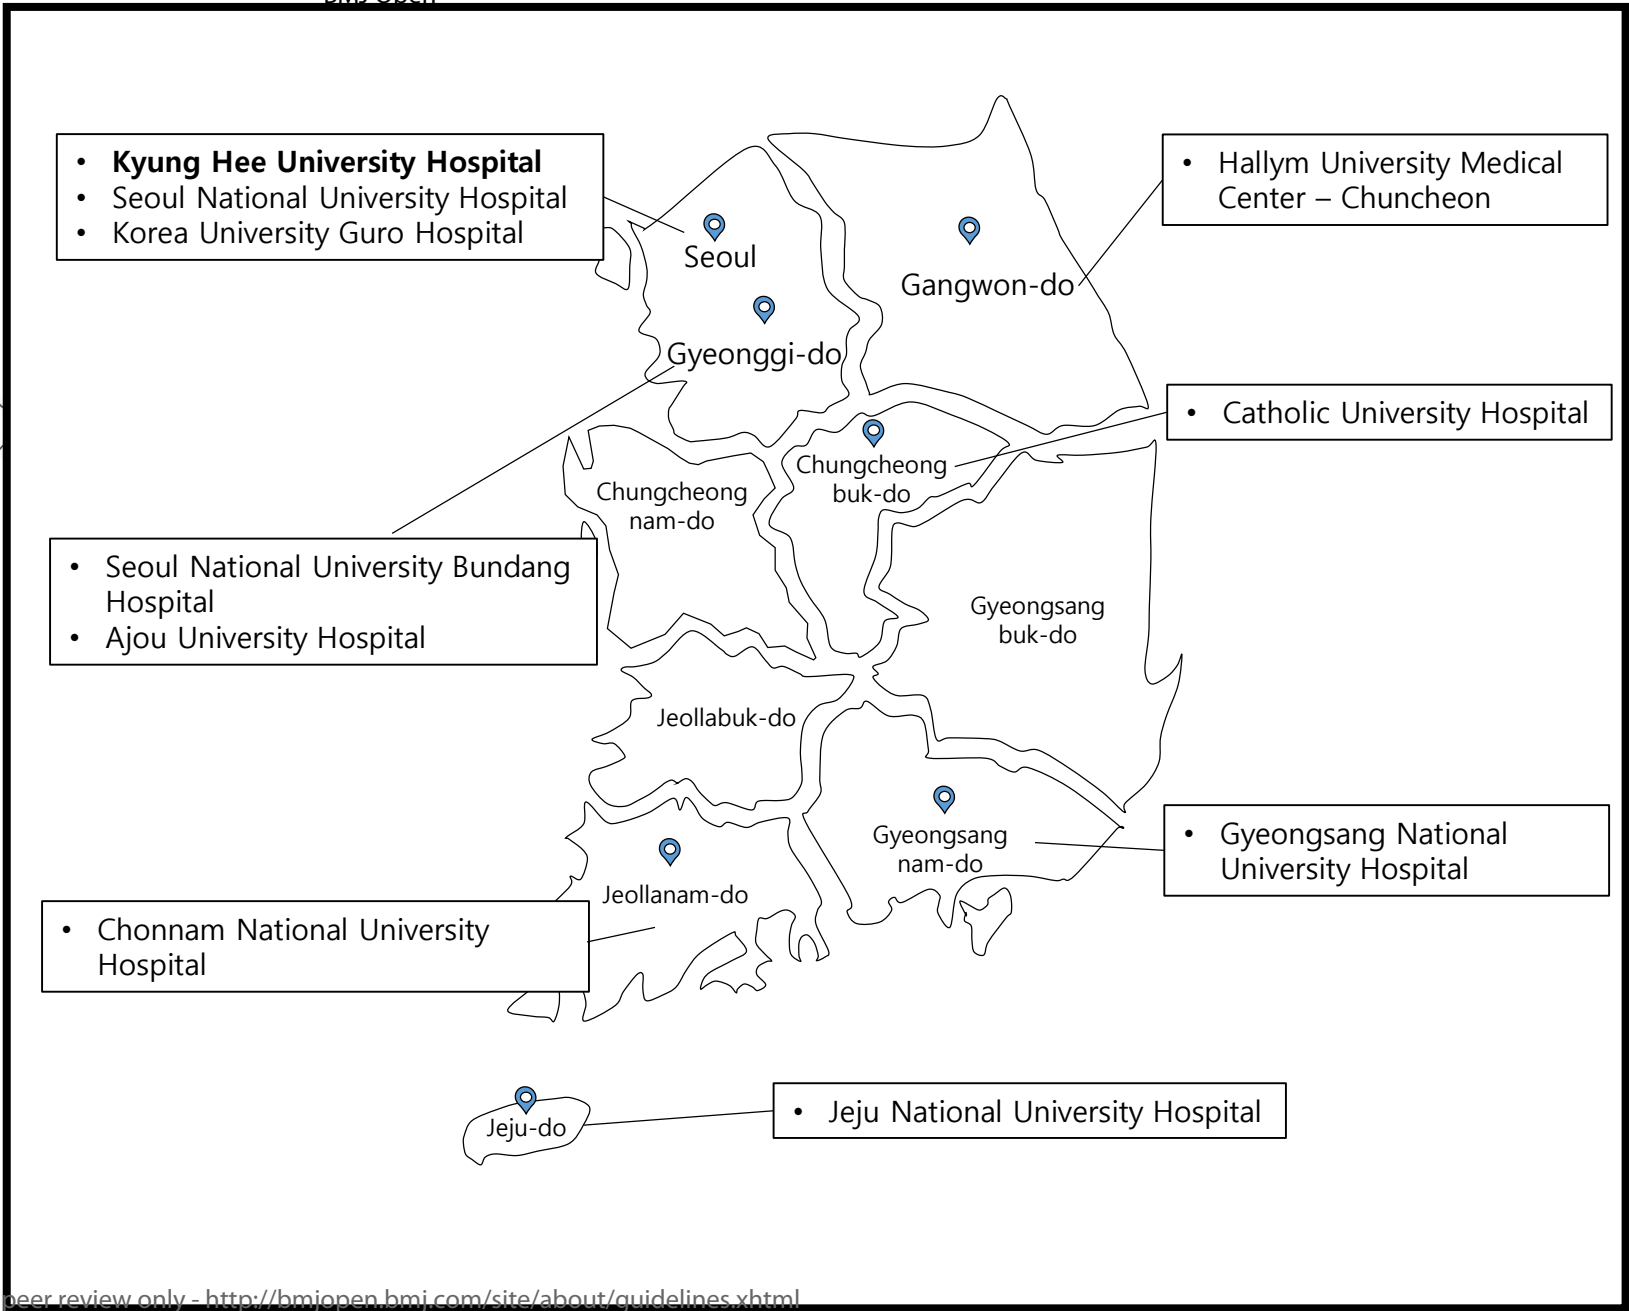

Supplement: bmjopen-2019-035573.draft_revisions.pdf [file bmjopen-2019-035573.draft_revisions.pdf]
